# Supplementary material
Source: PubMed Central journal article supplement (PMC5835151)
Supplement: mmc3.pdf [file mmc3.pdf]

# Selective $\alpha$ -Synuclein Knockdown in Monoamine Neurons by Intranasal Oligonucleotide Delivery: Potential Therapy for Parkinson's Disease

Diana Alarcón-Arís,<sup>1,2,9</sup> Ariadna Recasens,<sup>4,5,9,10</sup> Mireia Galofré,<sup>1,2</sup> Iria Carballo-Carbajal,<sup>4,5</sup> Nicolás Zacchi,<sup>6</sup> Esther Ruiz-Bronchal,<sup>1,2,3</sup> Rubén Pavia-Collado,<sup>1,2</sup> Rosario Chica,<sup>6</sup> Albert Ferrés-Coy,<sup>1,2,3</sup> Marina Santos,<sup>6</sup> Raquel Revilla,<sup>6</sup> Andrés Montefeltro,<sup>6</sup> Isabel Fariñas,<sup>5,7</sup> Francesc Artigas,<sup>1,2,3</sup> Miquel Vila,<sup>4,5,8</sup> and Analia Bortolozzi<sup>1,2,3</sup>

<sup>1</sup>Institut d'Investigacions Biomèdiques August Pi i Sunyer (IDIBAPS), Barcelona, Spain; <sup>2</sup>Department of Neurochemistry and Neuropharmacology, IIBB-CSIC (Consejo Superior de Investigaciones Científicas), Barcelona 08036, Spain; <sup>3</sup>Centro de Investigación Biomédica en Red de Salud Mental (CIBERSAM), ISCIII, Madrid, Spain; <sup>4</sup>Neurodegenerative Diseases Research Group, Vall d'Hebron Research Institute, Barcelona 08035, Spain; <sup>5</sup>Centro de Investigación Biomédica en Red de Enfermedades Neurodegenerativas (CIBERNED), ISCIII, Madrid, Spain; <sup>6</sup>nLife Therapeutics S.L., Granada, Spain; <sup>7</sup>Department of Cellular Biology, Universitat de València, València, Spain; <sup>8</sup>Catalan Institution for Research and Advanced Studies (ICREA), Barcelona, Spain

**Progressive neuronal death in brainstem nuclei and widespread accumulation of  $\alpha$ -synuclein are neuropathological hallmarks of Parkinson's disease (PD). Reduction of  $\alpha$ -synuclein levels is therefore a potential therapy for PD. However, because  $\alpha$ -synuclein is essential for neuronal development and function,  $\alpha$ -synuclein elimination would dramatically impact brain function. We previously developed conjugated small interfering RNA (siRNA) sequences that selectively target serotonin (5-HT) or norepinephrine (NE) neurons after intranasal administration. Here, we used this strategy to conjugate inhibitory oligonucleotides, siRNA and antisense oligonucleotide (ASO), with the triple monoamine reuptake inhibitor indatraline (IND), to selectively reduce  $\alpha$ -synuclein expression in the brainstem monoamine nuclei of mice after intranasal delivery. Following internalization of the conjugated oligonucleotides in monoamine neurons, reduced levels of endogenous  $\alpha$ -synuclein mRNA and protein were found in substantia nigra pars compacta (SNc), ventral tegmental area (VTA), dorsal raphe nucleus (DR), and locus coeruleus (LC).  $\alpha$ -Synuclein knockdown by ~20%–40% did not cause monoaminergic neurodegeneration and enhanced forebrain dopamine (DA) and 5-HT release. Conversely, a modest human  $\alpha$ -synuclein overexpression in DA neurons markedly reduced striatal DA release. These results indicate that  $\alpha$ -synuclein negatively regulates monoamine neurotransmission and set the stage for the testing of non-viral inhibitory oligonucleotides as disease-modifying agents in  $\alpha$ -synuclein models of PD.**

## INTRODUCTION

Parkinson's disease (PD) is characterized pathologically by degeneration of discrete groups of neurons in the central, autonomic, and enteric nervous systems. Particularly, the loss of substantia nigra dopamine (DA) neurons causes the cardinal motor signs of

PD (tremor, rigidity, and bradykinesia).<sup>1</sup> Moreover, monoamine and non-monoamine neurons show intracellular aggregates, Lewy bodies and Lewy neurites, containing deposits of insoluble  $\alpha$ -synuclein.<sup>2–4</sup> Variants in the *Snc* gene, which encodes the  $\alpha$ -synuclein protein, modulate both PD risk<sup>5–7</sup> and  $\alpha$ -synuclein expression levels,<sup>8</sup> suggesting that  $\alpha$ -synuclein may be an early and integral mediator of the pathological cascade that ultimately results in neurodegeneration. The identification of families with duplication or triplication of the *Snc* gene (PARK4 locus, PD autosomal dominant Lewy body 4 [*Homo sapiens* (human)]) strengthened the link between  $\alpha$ -synuclein and PD, and indicated that increased concentrations of the wild-type protein alone can cause the disease.<sup>9,10</sup> In addition, growing evidence implicates cell-to-cell transmission of misfolded  $\alpha$ -synuclein as a common pathogenic mechanism in synucleinopathies.<sup>11–16</sup> Overall, these data point to  $\alpha$ -synuclein as a potential primary target for therapeutic intervention in PD.

Although the physiological function of  $\alpha$ -synuclein remains largely unknown, it may play a significant role in the regulation of neurotransmitter release, synaptic function, and neuroplasticity. Indeed, it is abundantly localized in presynaptic terminals<sup>17,18</sup> and is associated with the distal reserve pool of synaptic vesicles.<sup>19–22</sup>

Received 6 March 2017; accepted 22 November 2017;  
<https://doi.org/10.1016/j.ymthe.2017.11.015>.

<sup>9</sup>These authors contributed equally to this work.

<sup>10</sup>Present address: Kolling Institute, Royal North Shore Hospital, University of Sydney, Sydney, NSW, Australia.

**Correspondence:** Miquel Vila, Vall d'Hebron Research Institute, Pg. Vall d'Hebron 119-129, Barcelona 08035, Spain.

**E-mail:** [miquel.vila@vhir.org](mailto:miquel.vila@vhir.org)

**Correspondence:** Analia Bortolozzi, Department of Neurochemistry and Neuropharmacology (IIBB-CSIC), Institut d'Investigacions Biomèdiques August Pi I Sunyer (IDIBAPS), Rosello 161, Barcelona 08036, Spain.

**E-mail:** [analia.bortolozzi@iibb.csic.es](mailto:analia.bortolozzi@iibb.csic.es)

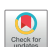

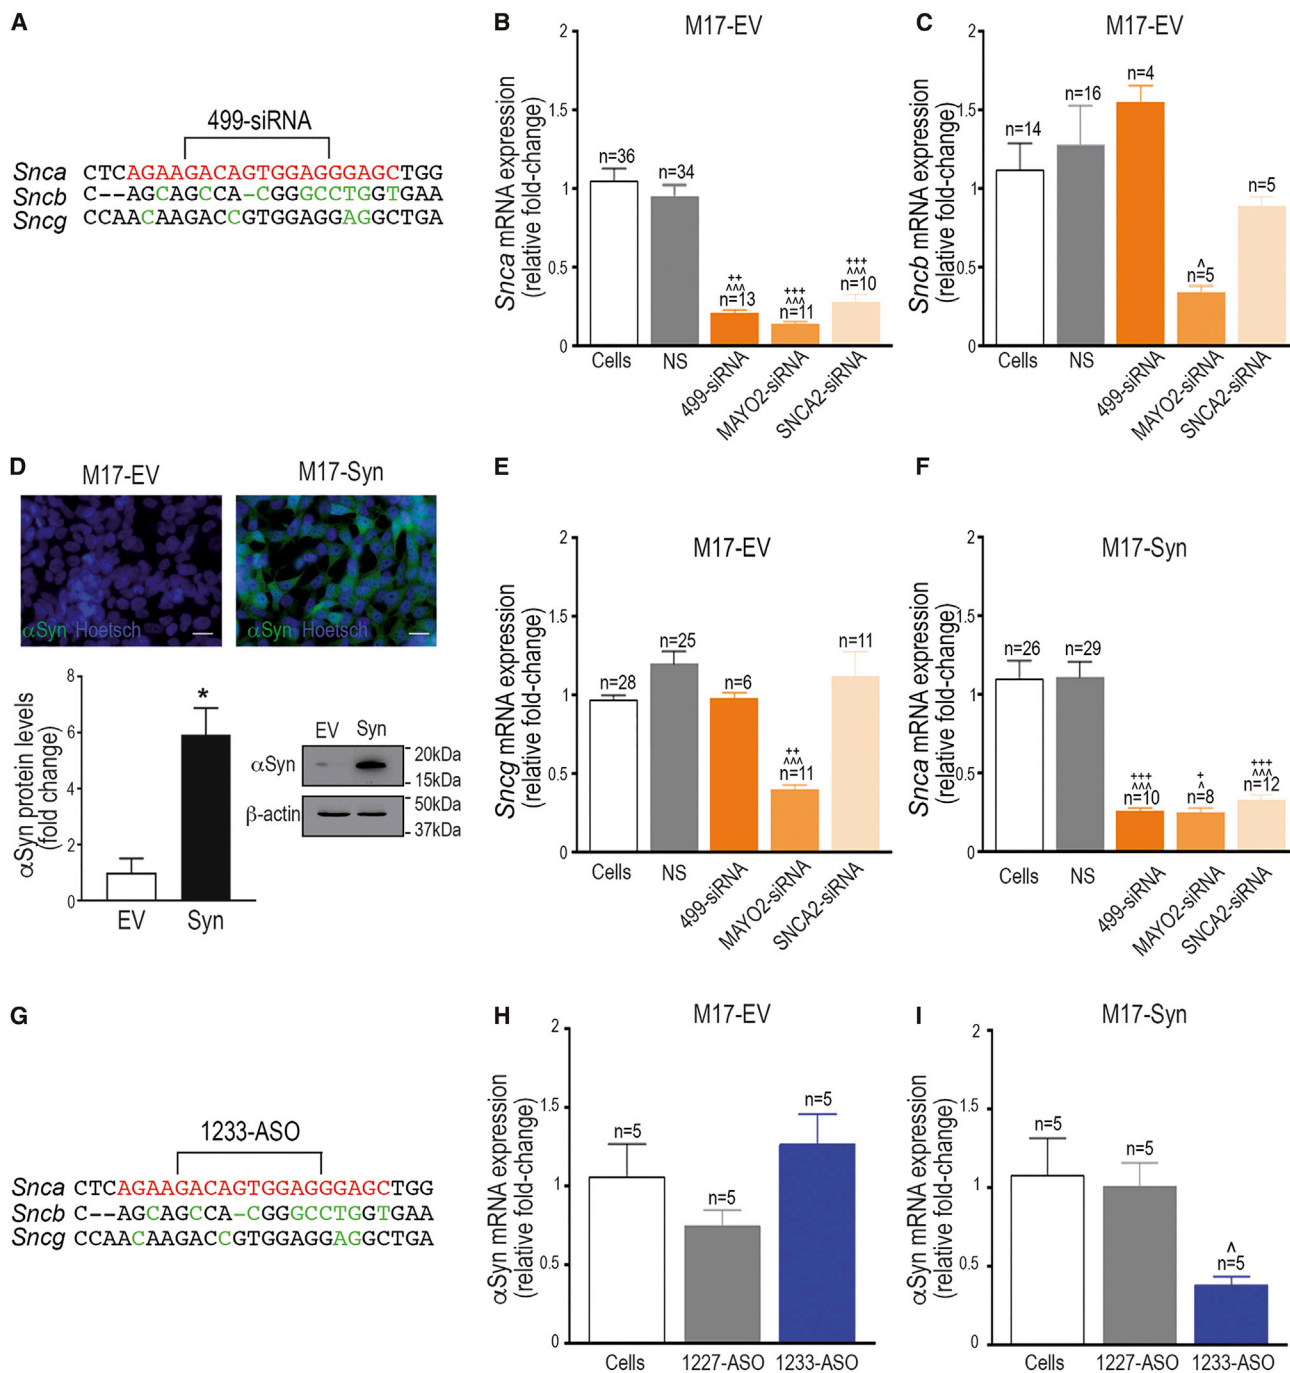

**Figure 1. 499-siRNA and 1233-ASO Molecules Selectively Reduce  $\alpha$ -Synuclein Expression in Cultured Cells**

(A and G) Comparative alignment showing the oligonucleotide sequence of human *SncA*, *SncB*, and *SncG*. Green letters indicate nucleotide differences compared with *SncA* sequence. Red letters indicate the specific sequence targeted by (A) 499-siRNA or (G) 1233-ASO. (B, C, and E) qRT-PCR quantification of *SncA* (B), *SncB* (C), and *SncG* (E) mRNA expression in M17-EV 24 hr after transfection with 200 nM 499-siRNA, MAYO2-siRNA, or SNCA2-siRNA. Cells transfected with nonsense siRNA (NS) were used as control. Target gene expression was normalized to two different housekeeping genes: GAPDH and RPLPO. (D) Top: immunofluorescence images showing  $\alpha$ -synuclein expression in M17-EV and M17-Syn. Blue: Hoechst staining; green:  $\alpha$ -synuclein. Scale bar: 20  $\mu$ m. Bottom:  $\alpha$ -synuclein immunoblot image and quantification confirming the overexpression of  $\alpha$ -synuclein protein levels in M17-Syn ( $n = 3$ ). \* $p < 0.05$ , compared with M17-EV cells (one-way ANOVA followed by Tukey's post hoc test). (F) qRT-PCR quantification of *SncA* expression in M17-Syn 24 hr after transfection with 499-siRNA, MAYO2-siRNA, and SNCA2-siRNA. Cells transfected with NS-siRNA were used as a control. (H and I) qRT-PCR quantification of  $\alpha$ -synuclein expression in (H) M17-EV or (I) M17-Syn cells transfected with 300 nM nonsense 1227-ASO or 1233-ASO for 24 hr.

(legend continued on next page)

Further, alterations in synaptic transmission have been found in mice overexpressing or down-expressing  $\alpha$ -synuclein.<sup>23–35</sup>

Despite this, it is still unclear how  $\alpha$ -synuclein contributes to early functional changes and cell death in PD, and potential strategies to either reduce the basal levels of  $\alpha$ -synuclein or to inhibit its process of aggregation are being explored. Preclinical studies have successfully shown  $\alpha$ -synuclein downregulation both in cell culture and animal models using antisense oligonucleotides (ASOs), ribozymes, small interfering RNAs (siRNAs), or microRNA without neurotoxic effects.<sup>36–42</sup> Yet, some studies reported DA neurodegeneration after  $\alpha$ -synuclein silencing using a viral delivery of short hairpin RNA (shRNA).<sup>43–45</sup> Despite these exciting prospects, the utility of oligonucleotide-based silencing strategies is severely compromised by the extreme difficulty to deliver oligonucleotides to specific neuronal populations because of the need to cross several biological barriers after administration and the enormous complexity of the mammalian brain.

We previously developed conjugated siRNA sequences that selectively target genes in the serotonin (5-HT) or norepinephrine (NE) neurons after intranasal delivery.<sup>46–49</sup> The covalent binding of the 5-HT or NE transporter (NET) blockers sertraline or reboxetine, respectively, to siRNA molecules allows their selective accumulation in 5-HT or NE neurons after crossing the semi-permeable nasal blood-brain barrier and being transported rapidly to the brain. Here, we assessed the cellular selectivity and efficacy of different oligonucleotide sequences to downregulate  $\alpha$ -synuclein expression *in vitro* and *in vivo*. We developed siRNA and ASO molecules conjugated with indatraline (IND; triple monoamine transporter blocker) to selectively knock down  $\alpha$ -synuclein expression in tyrosine hydroxylase (TH)<sup>+</sup> and tryptophan-hydroxylase<sub>2</sub> (TPH<sub>2</sub>)<sup>+</sup> neurons of mice after intranasal administration (i.n.). In addition, we evaluated the effects of  $\alpha$ -synuclein knockdown on dopaminergic and serotonergic function.

## RESULTS

### 499-siRNA and 1233-ASO Molecules Selectively Reduce $\alpha$ -Synuclein Expression *In Vitro*

Three siRNA sequences (499-siRNA, MAYO2-siRNA, SNCA2-siRNA) were designed and synthesized to target regions of the mouse and human *Snc*a mRNA encoding  $\alpha$ -synuclein protein. The target region was selected based on its minimal homology to *Snc*b or *Snc*g (encoding  $\beta$ - and  $\gamma$ -synuclein, respectively) (Figure 1A; Table S1). Sequences showing significant homology to other genes by BLAST search (<https://blast.ncbi.nlm.nih.gov/Blast.cgi>) were rejected.

First, the three  $\alpha$ -synuclein siRNA sequences (499-siRNA, MAYO2-siRNA, SNCA2-siRNA) were screened *in vitro* to determine their efficacy and detect off-target effects. The ability of siRNA sequences

to downregulate endogenous  $\alpha$ -synuclein expression was studied in M17 human neuroblastoma cells containing a control empty vector (M17-EV) by qRT-PCR at 24 hr after transfection. One-way ANOVA followed by Tukey's post hoc test indicated reductions of  $\alpha$ -synuclein expression of 78%  $\pm$  8% ( $p < 0.001$ ) for 499-siRNA, 86%  $\pm$  1% ( $p < 0.001$ ) for MAYO2-siRNA, and 72%  $\pm$  5% ( $p < 0.05$ ) for SNCA2-siRNA, respectively (Figure 1B). In contrast, M17-EV cells transfected with nonsense siRNA (NS; control group) did not show alterations of  $\alpha$ -synuclein mRNA levels. To confirm the selectivity of siRNAs, we also evaluated  $\beta$ - and  $\gamma$ -synuclein mRNA levels. MAYO2-siRNA significantly suppressed  $\beta$ - and  $\gamma$ -synuclein expression in M17-EV cells (66%  $\pm$  4%,  $p < 0.05$ ; and 59%  $\pm$  3%,  $p < 0.001$ , respectively). However, 499-siRNA and SNCA2-siRNA did not decrease either  $\beta$ - or  $\gamma$ -synuclein expression (Figures 1C and 1E).

Next, we evaluated the efficacy of siRNAs targeting  $\alpha$ -synuclein in an *in vitro* PD-like model consisting of M17 cells overexpressing wild-type human  $\alpha$ -synuclein (M17-Syn; Figure 1D). One-way ANOVA analyses followed by Tukey's post hoc test revealed that all siRNA sequences reduced to the same extent the increased  $\alpha$ -synuclein levels in M17-Syn cells 24 hr after transfection (74%  $\pm$  2%,  $p < 0.001$  for 499-siRNA; 75%  $\pm$  3%,  $p < 0.05$  for MAYO2-siRNA; and 67%  $\pm$  3%,  $p < 0.001$  for SNCA2-siRNA) (Figure 1F). Like in M17-EV cells, MAYO2-siRNA, but not 499-siRNA and SNCA2-siRNA, significantly decreased  $\beta$ - and  $\gamma$ -synuclein levels in M17-Syn cells (35%  $\pm$  4%,  $p < 0.05$ ; and 68%  $\pm$  5%,  $p < 0.05$ , respectively) (Figure S1).

In addition, an ASO molecule (1233-ASO), encompassing the same gene sequence as 499-siRNA, was also validated *in vitro* prior to *in vivo* studies (Figure 1G). As described above, M17-EV and M17-Syn cells were transfected with 300 nM nonsense ASO (1227-ASO) or 1233-ASO targeting  $\alpha$ -synuclein. Although no statistically significant differences were detected in M17-EV cells (Figure 1H), a significant effect of 1233-ASO was observed in M17-Syn cells (61  $\pm$  6;  $p < 0.05$ ) (Figure 1I). Both M17-EV and M17-Syn cells treated with 1227-ASO showed no alterations in  $\alpha$ -synuclein levels (Figure 1I). Based on these results, both 499-siRNA and 1233-ASO were used for subsequent studies *in vivo*.

### Selective Delivery of Conjugated ASO Molecules to Monoamine Neurons after i.n.

As summarized in the introductory section, the covalent binding of 5-HT or NE reuptake inhibitors to siRNA sequences allows their selective enrichment into raphe 5-HT neurons or locus coeruleus (LC) NE neurons after i.n.<sup>46–48</sup> We previously demonstrated that the main factor conferring the appropriate neuronal selectivity was the presence of covalently bound ligand rather than the oligonucleotide sequence.<sup>46,47</sup> Given the efficacy of 499-siRNA and 1233-ASO to

In all graphs, histograms represent average  $\pm$  SEM. <sup>^</sup> $p < 0.05$ , <sup>^^</sup> $p < 0.001$ , compared with cells treated with lipofectamine alone; <sup>\*</sup> $p < 0.05$ , <sup>\*\*</sup> $p < 0.01$ , <sup>\*\*\*</sup> $p < 0.001$ , compared with cells treated with NS-siRNA (one-way ANOVA followed by Tukey's post hoc test). 499-siRNA, MAYO2-siRNA, or SNCA2-siRNA are siRNA sequences designed to target regions of the *Snc*a mRNA encoding  $\alpha$ -synuclein protein (Table S1 shows siRNA sequences). M17-EV, M17 human neuroblastoma cells expressing empty vector; M17-Syn, M17 human neuroblastoma cells overexpressing  $\alpha$ -synuclein.



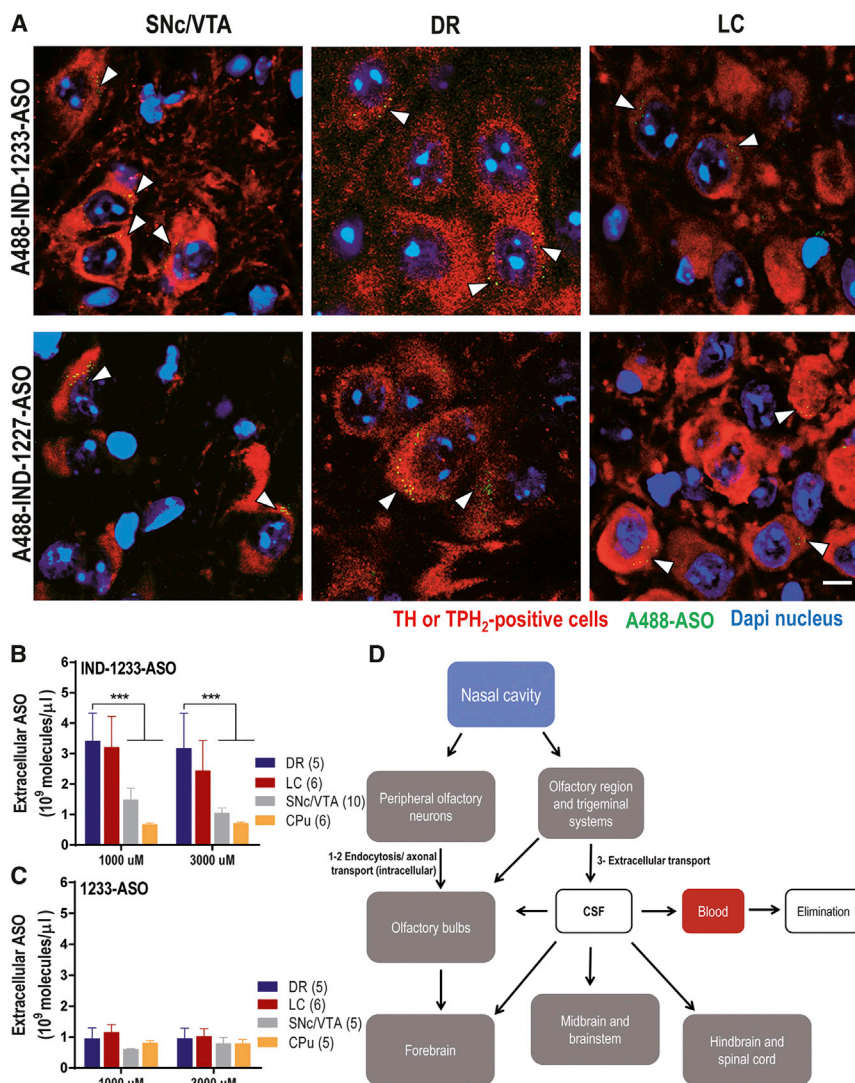

**Figure 2. Preferential Accumulation of Indatraline-Conjugated ASO Molecules in Monoamine Neurons after Intranasal Administration**

(A) Mice were intranasally administered with Alexa 488-labeled indatraline-conjugated 1233-ASO targeting  $\alpha$ -synuclein (A488-IND-1233-ASO) or Alexa 488-labeled indatraline-conjugated nonsense 1227-ASO (A488-IND-1227-ASO) at 30  $\mu$ g/day for 4 days and sacrificed 6 hr after last administration ( $n = 3$  mice/group). Confocal images showing the co-localization of A488-IND-ASOs (yellow) with TH<sup>+</sup> neurons (red) in the SNc/VTA and LC or with TPH<sub>2</sub><sup>+</sup> neurons (red) in the DR identified with white arrowheads. Cell nuclei were stained with DAPI (blue). Scale bars: 10  $\mu$ m. (B and C) Bars show the extracellular concentration of indatraline-conjugated 1233-ASO targeting  $\alpha$ -synuclein (IND-1233-ASO) (B) and 1233-ASO molecules (C) (expressed as 10<sup>9</sup> molecules/ $\mu$ L) in DR, LC, SNc/VTA, and CPU. Mice received two consecutive ASO doses (1000  $\mu$ M to 60  $\mu$ g and 3000  $\mu$ M to 180  $\mu$ g) intranasally administered with time intervals of 1 hr. Note the higher extracellular IND-1233-ASO concentration in the DR compared with all brain areas. Data are mean  $\pm$  SEM. \*\*\* $p < 0.001$  versus brain areas (two-way ANOVA followed by Tukey's post hoc test). (D) Proposed mechanisms for transport of indatraline-conjugated oligonucleotides to brain following intranasal administration. Three potential pathways have been indicated for compound transport to the olfactory bulb or olfactory subarachnoid space following intranasal administration: (1) receptor-mediated endocytosis into olfactory sensory neurons followed by slow intracellular transport (from hours to days) to the olfactory bulb, (2) non-specific endocytosis into olfactory sensory neurons followed by intracellular transport to the olfactory bulb, and (3) extracellular diffusion into the olfactory submucosa along open intercellular clefts in the olfactory epithelium with a rapid transport ( $\sim 30$  min) directly to the olfactory bulb or the olfactory subarachnoid space and entrance to the cerebrospinal fluid (CSF) circulation.<sup>58</sup> IND-1233-ASO could be rapidly transported to the brain following intranasal administration mediated by the pulsatile flow through CSF leading to subsequent uptake into monoaminergic neurons via functional monoamine transporters. CPU, caudate putamen; DR, dorsal raphe nucleus; LC, locus coeruleus; SNc/VTA, substantia nigra compacta/ventral tegmental area.

suppress  $\alpha$ -synuclein expression *in vitro*, we next conjugated these sequences to the triple monoamine reuptake inhibitor IND to attain cell-type-selective targeting and to enhance the uptake of oligonucleotide based on *in vitro* and *in vivo* pharmacological profile of IND. Indeed, *in vitro* studies indicated that this agent is a highly potent inhibitor at all three uptake sites of monoamine transporters (5-HT transporter [SERT] > NET > DA transporter [DAT]) with half maximal inhibitory concentration (IC<sub>50</sub>) values around 1–4 nM, lacking affinity for DA, 5-HT, NE, histamine, and cholinergic receptors. This *in vitro* profile results in a maximal *in vivo* occupancy and efficacy for the monoamine transporters.<sup>50</sup>

To examine the brain distribution of conjugated oligonucleotide following i.n., we first used Alexa 488-labeled IND-conjugated

nonsense ASO (A488-IND-1227-ASO) or IND-conjugated 1233-ASO (A488-IND-1233-ASO) molecules. Confocal fluorescence microscopy revealed that both A488-IND-1227-ASO and A488-IND-1233-ASO were intracellularly detected specifically in TPH<sub>2</sub><sup>+</sup> raphe 5-HT neurons and in TH<sup>+</sup> DA and NE neurons of substantia nigra pars compacta/ventral tegmental area (SNc/VTA) and LC, respectively (Figure 2A; Figure S2). In contrast, IND-conjugated ASO was absent in cells of brain areas close to the application site (olfactory bulbs) or to brain ventricles (hippocampus, hypothalamus, and striatum) (Figure S3), indicating that functional monoamine transporters (DAT, SERT, and NET) are a requirement for oligonucleotide uptake and internalization. Indeed, pre-treatment with selective monoamine transporter inhibitors (sertraline for SERT, nomifensine for DAT/NET, and reboxetine for NET) prior to intranasal treatment with

IND-conjugated ASO prevented the incorporation of oligonucleotide in each monoamine neuronal group expressing corresponding transporter (Figures S4–S6). In addition, IND-conjugated ASO co-localized with Rab5 (early endosome marker) and Rab7 (late endosome marker) (Figures S7–S9), which suggests the involvement of complex trafficking mechanisms after internalization in monoamine neurons as previously described for sertraline-conjugated siRNA.<sup>48</sup>

In order to assess whether the presence of IND led to a selective enrichment of conjugated ASO in monoamine nuclei, we determined the concentration of ASO molecules targeting  $\alpha$ -synuclein (unmodified and IND-conjugated 1233-ASO) in the extracellular space of different brain areas using a modified microdialysis procedure and stem-loop qRT-PCR.<sup>51,52</sup> Mice received two consecutive intranasal ASO doses (1000  $\mu$ M to 60  $\mu$ g and 3000  $\mu$ M to 180  $\mu$ g) with a time interval of 1 hr. The oligonucleotides were detected in the dialysate samples at 10–20 min post-administration. The concentration of IND-1233-ASO was found to be greater in the dorsal raphe nucleus (DR) and LC than in SNc or VTA (Figure 2B), perhaps due to the higher affinity of IND for SERT and NET than for DAT.<sup>50</sup> In addition, IND-1233-ASO concentration in the extracellular space of caudate putamen (CPu) was much lower than in brainstem nuclei, and similar to those found in all brain areas examined after the i.n. of the non-conjugated 1233-ASO (i.e., non-specific signal) (Figures 2B and 2C; Figure S3). Two-way ANOVA analysis followed by Tukey's post hoc test indicated an effect of brain area  $F(4,52) = 6.153$ ,  $p < 0.0004$ , but not of ASO concentration  $F(1,52) = 0.3864$ ,  $p = 0.763$ , nor area-by-concentration interaction  $F(4,52) = 0.1057$ ,  $p = 0.98$ .

A lower concentration of the non-conjugated 1233-ASO molecule was detected in the analyzed brain areas, likely owing to the absence of IND, which is required for the specific monoaminergic delivery. Two-way ANOVA analysis showed no significant effects between the brain areas and ASO concentration (Figure 2C).

#### IND-Conjugated 499-siRNA and 1233-ASO Induce Selective and Safe Knockdown of $\alpha$ -Synuclein *In Vivo*

Next, we examined the temporal pattern of  $\alpha$ -synuclein expression in the monoaminergic nuclei after treatment with IND-conjugated 499-siRNA (IND-499-siRNA) or IND-1233-ASO. For this purpose, mice were intranasally administered with IND-499-siRNA or IND-1233-ASO at 30  $\mu$ g/day for 4 consecutive days and euthanized at different times after the last administration (Figures 3A and 4A).  $\alpha$ -Synuclein mRNA levels in the SNc/VTA, DR, and LC, assessed by *in situ* hybridization, were significantly lower in IND-499-siRNA-treated mice than in control groups at 1 day post-administration ( $81\% \pm 2\%$ ,  $69 \pm 07\%$ , and  $76\% \pm 2\%$ , respectively, versus vehicle-treated mice), with a recovery of  $\alpha$ -synuclein expression to control values at day 3 post-administration (Figures 3B and 3C).  $\alpha$ -Synuclein mRNA levels were unchanged in cortical and subcortical brain regions (data not shown). Reduction of  $\alpha$ -synuclein mRNA expression in the SNc/VTA was confirmed by western blot procedures for murine  $\alpha$ -synuclein protein (Figures 3D and 3E). We found that IND-499-siRNA

(30  $\mu$ g/day for 4 days) decreased  $\alpha$ -synuclein protein levels in the SNc/VTA at 1 day post-administration ( $70\% \pm 3\%$  versus vehicle-treated mice), but not in projection areas, such as CPu (Figures 3D and 3E; Figures S10A and S10B). Importantly, IND-499-siRNA (30  $\mu$ g/day, 4 days, i.n.) did not induce any loss of SNc TH<sup>+</sup> DA neurons nor striatal TH<sup>+</sup> fibers (Figure S11). In addition, mRNA levels of  $\beta$ - and  $\gamma$ -synuclein, as well as of DAT, SERT, and NET, were unmodified by IND-499-siRNA in the SNc/VTA, DR, and LC, respectively (Figure S12). Altogether, these data support the specificity and safety of IND-499-siRNA effects.

Likewise, intranasal IND-1233-ASO treatment (30  $\mu$ g/day for 4 days) selectively reduced endogenous  $\alpha$ -synuclein mRNA expression in monoaminergic nuclei at 1 day post-administration (SNc/VTA:  $84\% \pm 2\%$ , DR:  $70\% \pm 5\%$ , and LC:  $79\% \pm 2\%$ , respectively, versus vehicle-treated mice) (Figures 4B and 4C). However, unlike IND-499-siRNA, IND-1233-ASO effect on  $\alpha$ -synuclein protein levels in the SNc/VTA and CPu was time dependent, with protein levels decreasing up to 3 days post-treatment and a recovery to basal levels at day 7 post-treatment (SNc/VTA:  $68\% \pm 5\%$ ,  $44\% \pm 3\%$ , and  $95\% \pm 20\%$ ; and CPu:  $67\% \pm 7\%$ ,  $97\% \pm 5\%$ , and  $99\% \pm 5\%$  at 1, 3, and 7 days post-administration, respectively, versus vehicle-treated mice) (Figures 4D and 4E; Figures S10C and S10D). IND-1233-ASO treatment did not induce any DA neurotoxicity (Figure S11). Furthermore,  $\beta$ -synuclein,  $\gamma$ -synuclein, DAT, SERT, and NET mRNA densities were unchanged by IND-1233-ASO in the monoaminergic nuclei (Figure S13). Overall, these results indicate that intranasal treatment with IND-1233-ASO would be a better choice for decreasing  $\alpha$ -synuclein levels specifically in monoaminergic nuclei than IND-499-siRNA, because it provides a more sustained knockdown of  $\alpha$ -synuclein expression.

#### ASO-Induced $\alpha$ -Synuclein Knockdown Enhances Forebrain DA Neurotransmission

To evaluate whether IND-1233-ASO-induced  $\alpha$ -synuclein silencing in SNc/VTA can modulate forebrain DA function, we performed a series of microdialysis experiments in freely moving mice. No difference was observed in baseline DA concentration in the CPu and medial prefrontal cortex (mPFC) among knockdown mice and control groups treated with PBS or IND-1227-ASO (Table S2). However, the infusion of the depolarizing agent veratridine (50  $\mu$ M) by reverse dialysis increased  $\sim 5$ -fold striatal DA release in IND-1233-ASO-treated mice versus  $\sim 2$ -fold in the control groups treated with PBS or IND-1227-ASO (Figure 5A). Two-way ANOVA followed by Tukey's post hoc test analysis showed an effect of group  $F(2,21) = 3.58$  ( $p < 0.05$ ), time  $F(15,315) = 8.94$  ( $p < 0.0001$ ), and group-by-time interaction  $F(30,315) = 1.761$  ( $p < 0.01$ ). A similar effect of veratridine on DA release was detected in the mouse mPFC (Figure 5F). Two-way ANOVA showed effect of group  $F(1,10) = 7.26$  ( $p < 0.05$ ), time  $F(15,150) = 8.12$  ( $p < 0.0001$ ), but not group-by-time interaction.

$\alpha$ -Synuclein modulates the function of DAT and vesicular monoamine transporter (VMAT<sub>2</sub>) in DA terminals.<sup>53,54</sup> Local application



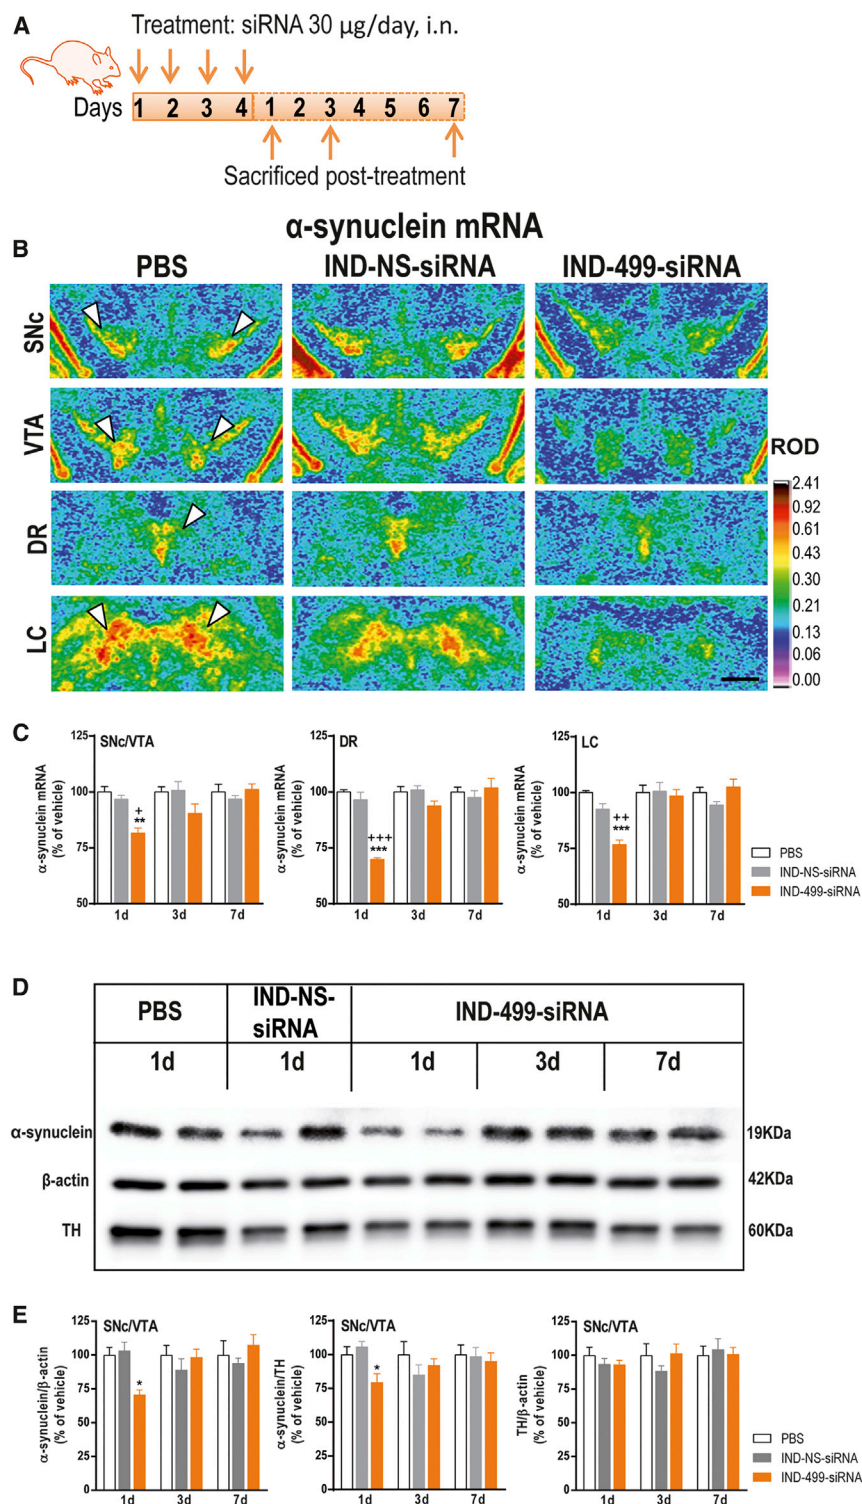

**Figure 3. Intranasal Indatraline-Conjugated 499-siRNA Treatment Downregulates  $\alpha$ -Synuclein Expression**

(A) Schematic representation of the treatment. Mice were intranasally administered with PBS, indatraline-conjugated nonsense siRNA (IND-NS-siRNA), or indatraline-conjugated 499-siRNA (IND-499-siRNA) at 30 µg/day for 4 days and were sacrificed at 1, 3, or 7 days after last administration (1, 3, or 7 days, respectively;  $n = 5-10$  mice/group). (B) Coronal brain sections showing reduced  $\alpha$ -synuclein mRNA levels in the SNc, VTA, DR, and LC of mice treated with IND-499-siRNA (4 days) and sacrificed at 1 day post-administration were assessed by *in situ* hybridization (ISH). Signal represents the relative optical density (ROD) of autoradiograms as indicated at the right-hand side of the image. White arrowheads show  $\alpha$ -synuclein mRNA expression in SNc, VTA, DR and LC. Scale bar: 500 µm. (C) Time course of  $\alpha$ -synuclein mRNA suppression in the monoaminergic nuclei after intranasal IND-499-siRNA administration. Bar graphs showing a significant reduction of  $\alpha$ -synuclein mRNA level compared with their respective controls at day 1 post-administration. Conversely, no difference was detected at days 3 and 7 post-administration. \*\* $p < 0.01$ , \*\*\* $p < 0.001$ , versus PBS-treated mice; \* $p < 0.05$ , \*\* $p < 0.01$ , \*\*\* $p < 0.001$  versus IND-NS-siRNA (two-way ANOVA followed by Tukey's post hoc test). (D) Image of immunoblot of  $\alpha$ -synuclein,  $\beta$ -actin, and tyrosine hydroxylase (TH) in SNc/VTA of mice treated with PBS or IND-conjugated siRNAs. (E) Bar graphs showing  $\alpha$ -synuclein protein levels in SNc/VTA normalized against  $\beta$ -actin or TH, and TH protein levels normalized against  $\beta$ -actin. IND-499-siRNA reduced  $\alpha$ -synuclein protein level in SNc/VTA 24 hr after last administration; then  $\alpha$ -synuclein level was recovered 3 days later. \* $p < 0.05$  versus control groups (two-way ANOVA followed by Tukey's post hoc test). Data are mean  $\pm$  SEM. DR, dorsal raphe nucleus; LC, locus coeruleus; SNc/VTA, substantia nigra compacta/ventral tegmental area.

than in control groups (Figure 5B). Two-way ANOVA showed the effect of group  $F(2,16) = 8.38$  ( $p < 0.01$ ), time  $F(19,304) = 54.19$  ( $p < 0.0001$ ), and group-by-time interaction  $F(38,304) = 6.463$  ( $p < 0.0001$ ). Similarly, amphetamine (DA releaser and DAT inhibitor, 1-10-100 µM) dose-dependently elevated dialysate DA concentration in the striatum, being significantly higher in IND-1233-ASO-treated mice [effect of group  $F(2,14) = 17.18$ ,  $p < 0.001$ ; time  $F(19,266) = 49.19$ ,  $p < 0.0001$ ; and group-by-time interaction  $F(38,266) = 8.62$ ,  $p < 0.0001$ ] (Figure 5C). Likewise, local nomifensine or amphetamine administration produced a more robust increase of extracellular DA levels in the mPFC of  $\alpha$ -synuclein knockdown mice than in control group (Figures 5G and 5H). Two-way ANOVA showed an effect of time  $F(19,171) = 9.36$  ( $p < 0.0001$ ) and

of DAT/NET inhibitor, nomifensine (1-10-50 µM) increased dose-dependently the extracellular DA concentration in the CPu. This effect was more pronounced in  $\alpha$ -synuclein knockdown mice

than in control group (Figures 5G and 5H). Two-way ANOVA showed an effect of time  $F(19,171) = 9.36$  ( $p < 0.0001$ ) and

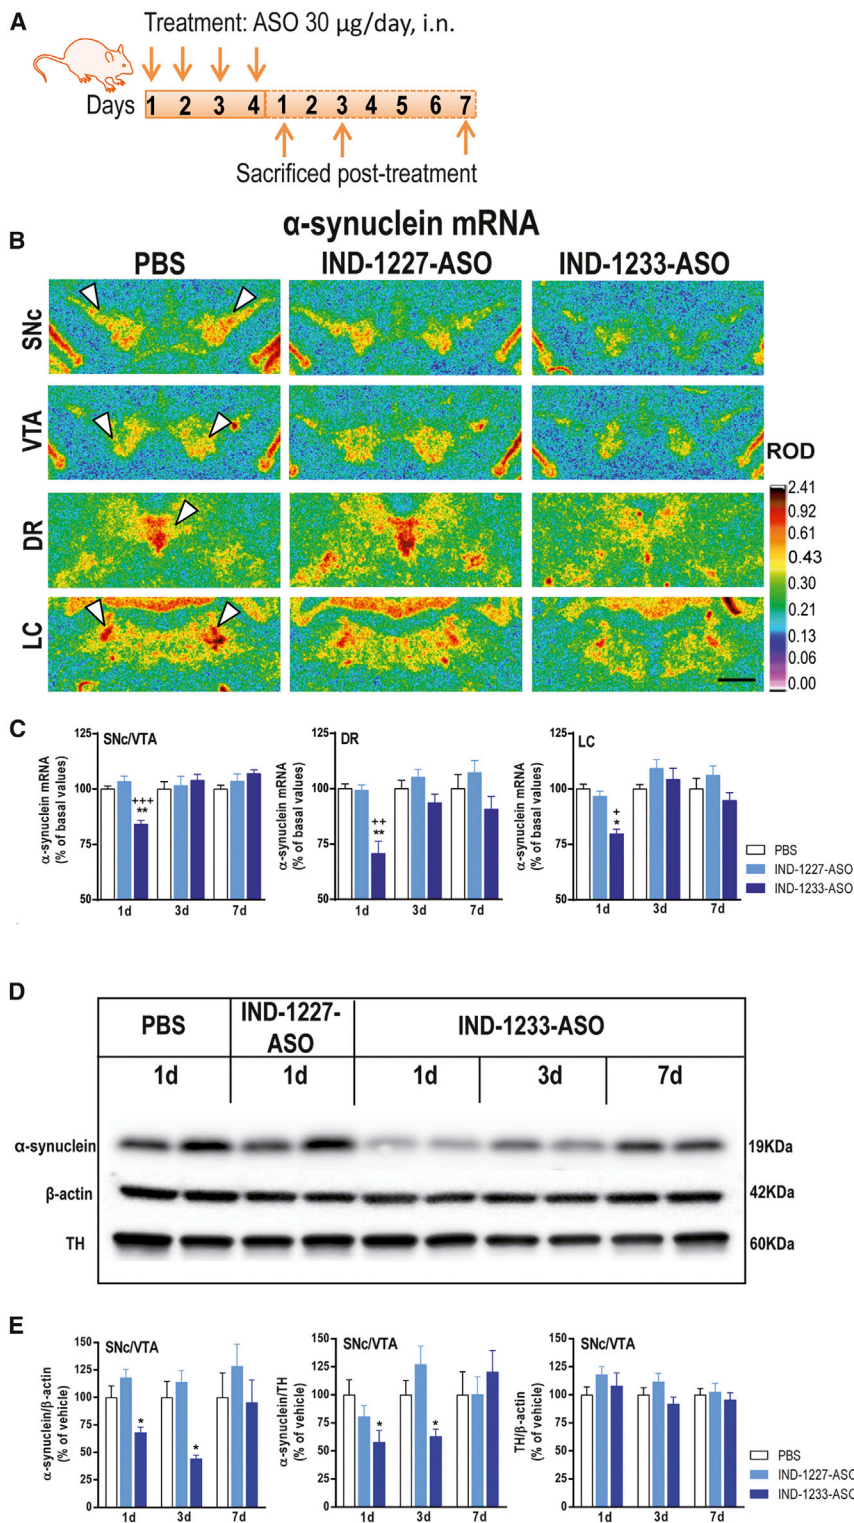

**Figure 4. Intranasal Indatraline-Conjugated 1233-ASO Treatment Downregulates  $\alpha$ -Synuclein Expression**

(A) Schematic representation of the treatment. Mice were intranasally administered with PBS, indatraline-conjugated nonsense ASO (IND-1227-ASO), or indatraline-conjugated 1233-ASO (IND-1233-ASO) at 30  $\mu$ g/day for 4 days and were sacrificed at 1, 3, or 7 days after last administration (1, 3, or 7 days, respectively;  $n = 5-10$  mice/group). (B) Coronal brain sections showing reduced  $\alpha$ -synuclein mRNA levels in the SNc, VTA, DR, and LC of mice treated with IND-1233-ASO (4 days) and sacrificed at 1 day post-administration assessed by *in situ* hybridization (ISH). Signal represents the relative optical density (ROD) of autoradiograms as indicated at the right-hand side of the image. White arrowheads show  $\alpha$ -synuclein mRNA expression in SNc, VTA, DR and LC. Scale bar: 500  $\mu$ m. (C) Time course of  $\alpha$ -synuclein mRNA suppression in the monoaminergic nuclei after intranasal IND-1233-ASO administration. Bar graphs showing a significant reduction of  $\alpha$ -synuclein mRNA level compared with their respective controls at day 1, but not at 3 and 7 days post-administration. \* $p < 0.05$ , \*\* $p < 0.01$  versus PBS-treated mice; \* $p < 0.05$ , \*\* $p < 0.01$ , \*\*\* $p < 0.001$  versus IND-1227-ASO (two-way ANOVA followed by Tukey's post hoc test). (D) Image of immunoblot of  $\alpha$ -synuclein,  $\beta$ -actin, and tyrosine hydroxylase (TH) in SNc/VTA of mice treated with PBS or IND-conjugated ASOs. (E) Bar graphs showing  $\alpha$ -synuclein protein levels in SNc/VTA normalized against  $\beta$ -actin or TH, and TH protein levels normalized against  $\beta$ -actin. IND-1233-ASO decreased  $\alpha$ -synuclein protein levels in SNc/VTA up to 3 days post-treatment, with a subsequent recovery to basal values at 7 days. \* $p < 0.05$  versus control groups (two-way ANOVA followed by Tukey's post hoc test). Data are mean  $\pm$  SEM. DR, dorsal raphe nucleus; LC, locus coeruleus; SNc/VTA, substantia nigra compacta/ventral tegmental area.



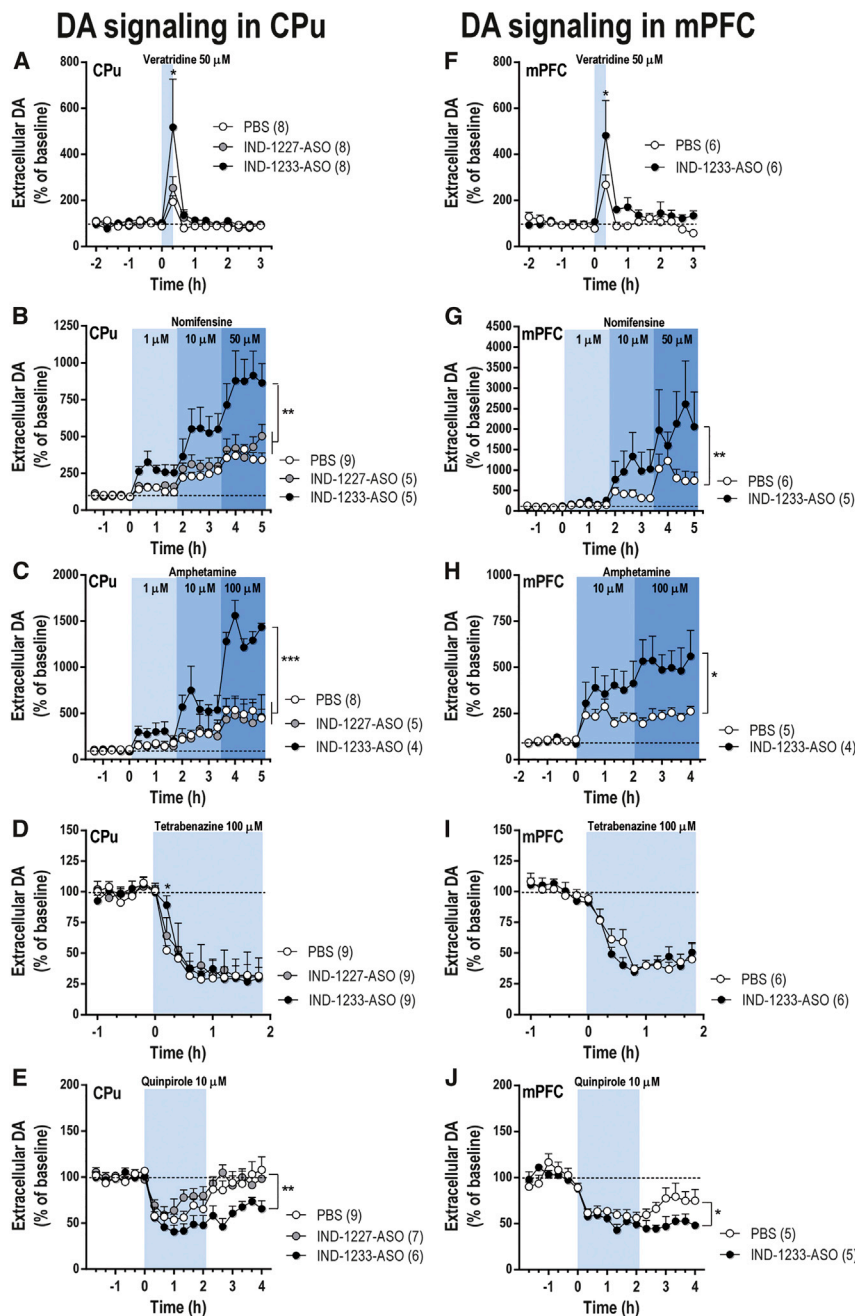

**Figure 5. Neurochemical Effects on Forebrain DA Neurotransmission of IND-1233-ASO-Induced  $\alpha$ -Synuclein Knockdown**

Mice were intranasally administered with PBS, indatraline-conjugated nonsense ASO (IND-1227-ASO), or indatraline-conjugated 1233-ASO (IND-1233-ASO) at 30  $\mu$ g/day for 4 days. Microdialysis experiments were conducted between 1 and 3 days after last administration. (A and F) Local veratridine infusion (depolarizing agent, 50  $\mu$ M) by reverse dialysis increased extracellular DA release in CPu (A) and mPFC (F). This effect was more significant in IND-1233-ASO-treated mice than in control groups. (B and G) Nomifensine (DAT inhibitor, 1-10-50  $\mu$ M) increased more significantly extracellular DA levels in CPu (B) and mPFC (G) of  $\alpha$ -synuclein knockdown mice than in control groups. (C and H) Similarly, local infusion of amphetamine (DA releaser, 1-10-100  $\mu$ M) induced a higher DA release in CPu (C) and mPFC (H) of IND-1233-ASO-treated mice versus control mice. (D and I) Local tetrabenazine (VMAT<sub>2</sub> inhibitor, 100  $\mu$ M) application significantly reduced DA release in both brain areas: CPu (D) and mPFC (I). Only in the CPu (D) was this effect faster in control mice than in  $\alpha$ -synuclein knockdown mice. (E and J) Local activation of DA D<sub>2/3</sub> receptor in CPu (E) and mPFC (J) by the infusion of 10  $\mu$ M quinpirole by reverse dialysis reduced DA release in all treatments. However, after quinpirole was removed, control groups recovered baseline DA levels faster than  $\alpha$ -synuclein knockdown mice. The number of mice used in each experiment is shown in parentheses. \* $p < 0.05$ , \*\* $p < 0.01$ , \*\*\* $p < 0.001$  compared with control groups (two-way ANOVA followed by Tukey's post hoc test). Data are mean  $\pm$  SEM. CPu, caudate putamen; mPFC, medial prefrontal cortex.

tetrabenazine produced a significantly lesser decline in IND-1233-ASO-treated mice versus control groups.

To obtain more information on the mechanisms controlling DA neurotransmission in SNc/VTA  $\alpha$ -synuclein knockdown mice, we examined the effect of the DA D<sub>2</sub> receptor agonist quinpirole on DA release. Local quinpirole infusion (10  $\mu$ M) markedly reduced DA release in CPu and mPFC of all experimental groups (Figures 5E and 5J). After the replacement of the artificial cerebrospinal fluid

(aCSF) containing quinpirole by standard aCSF, DA release returned to baseline values in control groups (PBS- and IND-1227-ASO-treated mice), but remained reduced in IND-1233-ASO-treated mice (Figure 5E). Two-way ANOVA showed a significant effect of the group  $F(2,19) = 6.22$  ( $p < 0.01$ ), time  $F(17,119) = 13.31$  ( $p < 0.0001$ ), and group-by-time interaction  $F(17,119) = 3.58$  ( $p < 0.0001$ ) for amphetamine. In addition, local tetrabenazine application (VMAT<sub>2</sub> inhibitor, 100  $\mu$ M) decreased dialysate DA concentration to a minimum of  $\sim 28\%$  (CPu) and  $\sim 34\%$  (mPFC) of baseline in all experimental groups at 30–40 min post-infusion (Figures 5D and 5I). However, in the CPu (but not mPFC), prior to the massive DA depletion,

(aCSF) containing quinpirole by standard aCSF, DA release returned to baseline values in control groups (PBS- and IND-1227-ASO-treated mice), but remained reduced in IND-1233-ASO-treated mice (Figure 5E). Two-way ANOVA showed a significant effect of the group  $F(2,19) = 6.22$  ( $p < 0.01$ ), time  $F(17, 323) = 16.19$  ( $p < 0.0001$ ), and group-by-time interaction  $F(34,323) = 1.71$  ( $p < 0.01$ ). Similar effects were detected in the mPFC of IND-1233-ASO-treated compared with PBS-treated mice (Figure 5J). Two-way ANOVA analysis showed an effect of



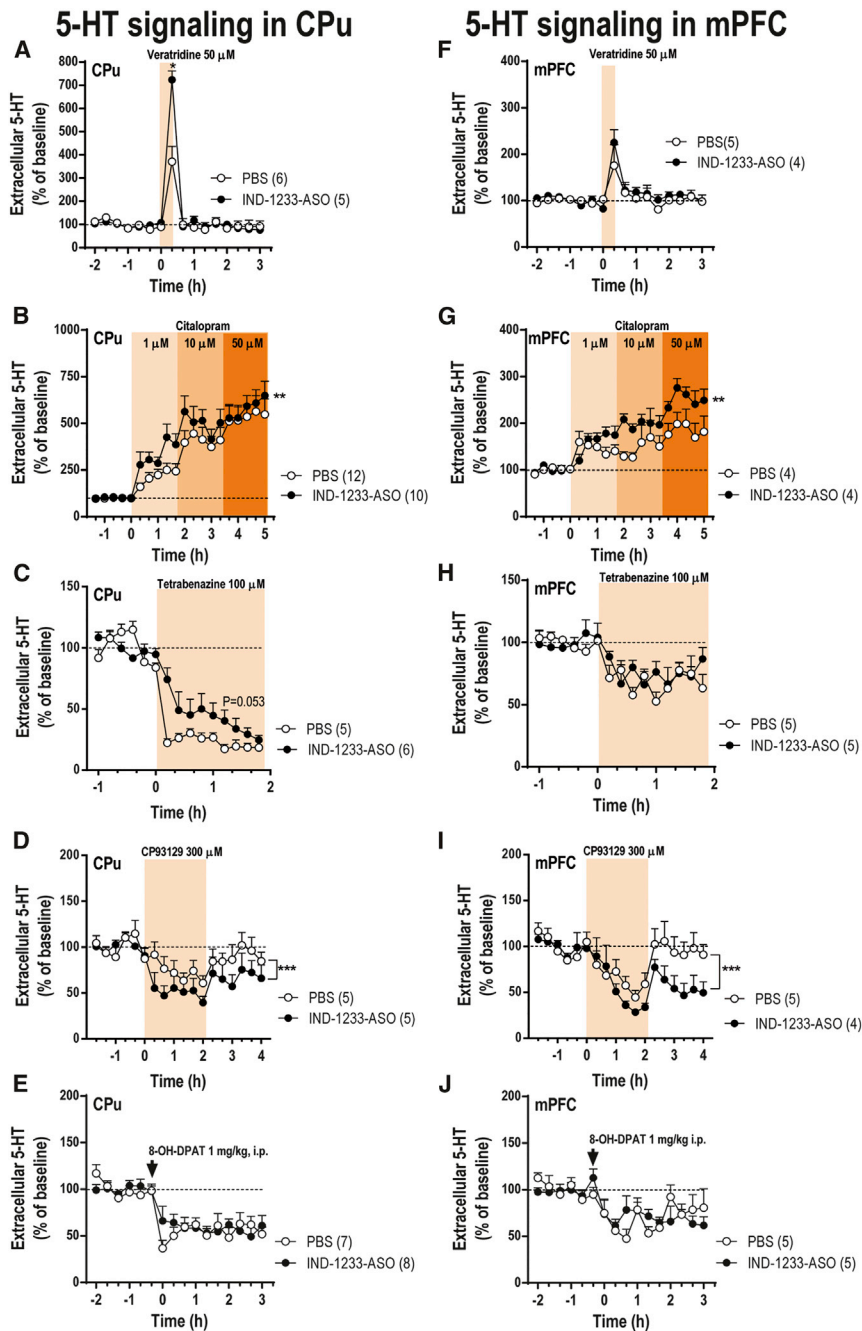

**Figure 6. Neurochemical Effects on Forebrain 5-HT Neurotransmission of IND-1233-ASO-Induced  $\alpha$ -Synuclein Knockdown**

Mice were intranasally administered with PBS or indatraline-conjugated 1233-ASO (IND-1233-ASO) at 30  $\mu$ g/day for 4 days. Microdialysis experiments were conducted between 1 and 3 days after last administration. (A and F) Local veratridine infusion (depolarizing agent, 50  $\mu$ M) by reverse dialysis increased extracellular 5-HT release in CPU (A), but not in mPFC (F). This effect was more significant in IND-1233-ASO-treated mice than in PBS-treated mice. (B and G) Citalopram (SERT inhibitor, 1-10-50  $\mu$ M) increased more significantly extracellular 5-HT levels in CPU (B) and mPFC (G) of  $\alpha$ -synuclein knockdown mice than in PBS mice. (C and H) Local tetrabenazine (VMAT<sub>2</sub> inhibitor, 100  $\mu$ M) application significantly reduced 5-HT release in CPU (C) and mPFC (H). However, only CPU reached a marginal statistical difference between phenotypes ( $p = 0.053$ ), with a greater effect of tetrabenazine in control than in  $\alpha$ -synuclein knockdown mice. (D and I) Local activation of 5-HT<sub>1B</sub> receptor in CPU (D) and mPFC (I) by the infusion of 300  $\mu$ M CP93129 by reverse dialysis reduced 5-HT release in PBS and  $\alpha$ -synuclein knockdown mice. However, after CP93129 was removed, PBS mice recovered baseline 5-HT levels more rapidly than  $\alpha$ -synuclein knockdown mice. (E and J) Systemic 8-OH-DPAT (5-HT<sub>1A</sub> receptor agonist, 1 mg/kg i.p.) administration reduced 5-HT release similarly in CPU (E) and mPFC (J) of PBS and  $\alpha$ -synuclein knockdown mice. The number of mice used in each experiment is shown in parentheses. \* $p < 0.05$ , \*\* $p < 0.01$ , \*\*\* $p < 0.001$  compared with PBS mice (two-way ANOVA followed by Tukey's post hoc test). Data are mean  $\pm$  SEM. CPU, caudate putamen; mPFC, medial prefrontal cortex.

previously observed for DA (see above), there were no differences in basal 5-HT concentration in CPU and mPFC between the different groups (Table S2). We first evaluated the effect of veratridine (50  $\mu$ M) on striatal or cortical 5-HT release (Figures 6A and 6F). Compared with PBS-treated mice, veratridine-stimulated 5-HT levels in CPU (but not in mPFC) were higher in IND-1233-ASO-treated mice [effect of time  $F(15,135) = 69.05$ ,  $p < 0.0001$ , and group-by-time interaction  $F(15,135) = 10.71$ ,  $p < 0.0001$ , but not of group]. Furthermore,

time  $F(17, 136) = 22.89$  ( $p < 0.0001$ ) and group-by-time interaction  $F(17,136) = 2.01$  ( $p < 0.01$ ), but not of group.

#### ASO-Induced $\alpha$ -Synuclein Knockdown Enhances Forebrain 5-HT Neurotransmission

Given the involvement of  $\alpha$ -synuclein in the regulation of synaptic transmission in general and not only of the DA system,<sup>29</sup> we also examined whether the knockdown of  $\alpha$ -synuclein expression in DR serotonergic neurons may affect forebrain 5-HT function. As

local application of the SERT inhibitor citalopram (1-10-50  $\mu$ M) dose-dependently increased the extracellular 5-HT concentration in the CPU and mPFC. This effect was significantly higher in IND-1233-ASO-treated mice than in PBS-treated mice (Figures 6B and 6G). Two-way ANOVA showed an effect of time  $F(19,152) = 18.84$  ( $p < 0.0001$ ) and group-by-time interaction  $F(19,152) = 2.092$  ( $p < 0.001$ ), but not of group in CPU, and an effect time  $F(19,133) = 14.82$  ( $p < 0.0001$ ) and group-by-time interaction  $F(19,133) = 2.07$  ( $p < 0.01$ ), but not group in the mPFC. Likewise,

we found that local tetrabenazine infusion (100  $\mu$ M) decreased 5-HT release in the striatum, but not in mPFC, more markedly in control mice than in IND-1233-ASO-treated mice [marginal effect of group  $F(1,9) = 4.92$ ,  $p = 0.053$ ; effect of time  $F(14,126) = 56.25$ ,  $p < 0.0001$ ; and group-by-time interaction  $F(14,126) = 3.41$ ,  $p < 0.0001$ ] (Figures 6C and 6H).

Systemic administration of 5-HT<sub>1A</sub> receptor agonist 8-OH-DPAT (1 mg/kg intraperitoneally [i.p.]) comparably reduced the extracellular 5-HT level in control and IND-1233-ASO mice [effect of time  $F(15,195) = 15.77$ ,  $p < 0.0001$ , and  $F(15,120) = 5.37$ ,  $p < 0.0001$ , but not of group and group-by-time interaction in CPu and mPFC, respectively] (Figures 6E and 6J). However, the local perfusion of 5-HT<sub>1B</sub> receptor agonist CP93129 (300  $\mu$ M) reduced more markedly 5-HT release in CPu and mPFC of IND-1233-ASO-treated mice than in control mice (Figures 6D and 6I). Two-way ANOVA showed an effect of group  $F(1,14) = 13.47$  ( $p < 0.001$ ) and time  $F(17,144) = 4.19$  ( $p < 0.0001$ ), but not group-by-time interaction in CPu, and an effect of group  $F(1,12) = 15.62$  ( $p < 0.001$ ) and time  $F(17,119) = 6.46$  ( $p < 0.0001$ ), but not group-by-time interaction in mPFC. As observed for the effect of quinpirole on DA release, the effect of CP93129 on 5-HT release persisted after the end of reverse dialysis only in IND-1233-ASO-treated mice. Overall, these data support that  $\alpha$ -synuclein knockdown in the cell bodies of DA and 5-HT neurons facilitates the terminal release of the respective neurotransmitters in projection areas of the forebrain, also altering the function of axon terminal autoreceptors (DA D2 and 5-HT 5-HT<sub>1B</sub>).

#### $\alpha$ -Synuclein Overexpression in TH<sup>+</sup> Neurons Impairs DA Release in the Nigrostriatal Pathway

To obtain more information about the role of  $\alpha$ -synuclein on the *in vivo* DA release and reuptake in the CPu, we used a mouse transgenic model overexpressing human wild-type  $\alpha$ -synuclein selectively in TH<sup>+</sup> neurons (referred as TG<sup>+</sup> onward). Immunoblot with an antibody that recognizes both rodent and human  $\alpha$ -synuclein showed that  $\alpha$ -synuclein expression in TG<sup>+</sup> mice is 2- to 3-fold greater than murine endogenous levels. This range not only reduces the likelihood of toxicity due to massive protein expression, but also reproduces the levels of  $\alpha$ -synuclein accumulation in patients with duplication or triplication of the gene.<sup>29,55,56</sup> Indeed, TG<sup>+</sup> mice showed a normal development, maintenance of TH-immunoreactive nigral neurons and locomotor activity, being an appropriate model to evaluate the biological, but not pathological, function of  $\alpha$ -synuclein on synaptic DA neurotransmission.<sup>55</sup> Like  $\alpha$ -synuclein knockdown mice (see above), TG<sup>+</sup> mice showed no differences in baseline DA levels in CPu as compared with TG<sup>-</sup> mice (Table S2). In contrast, veratridine increased extracellular DA in CPu much less in TG<sup>+</sup> mice than in the TG<sup>-</sup> mice [marginal effect of group  $F(1,8) = 4.45$ ,  $p = 0.06$ ; time  $F(15,120) = 10.17$ ,  $p < 0.0001$ ; and group-by-time interaction  $F(15,120) = 2.96$ ,  $p < 0.001$ ] (Figure 7A). Moreover, local nomifensine application (1-10-50  $\mu$ M) evoked a significantly lesser increase of extracellular DA concentration in the CPu of TG<sup>+</sup> compared with TG<sup>-</sup> mice [group  $F(1,8) = 5.93$ ,  $p < 0.05$ ; time  $F(19,152) = 10.45$ ,  $p < 0.0001$ ; and group-by-time interaction  $F(19,152) = 1.85$ ,

$p < 0.05$ ] (Figure 7B). No significant differences on DA release were seen between both phenotypes after local amphetamine or tetrabenazine infusion by reverse dialysis (Figures 7C and 7D). However, the reduction of striatal DA release after local quinpirole infusion in TG<sup>-</sup> mice was absent in TG<sup>+</sup> mice, suggesting that the inhibitory feedback mechanism mediated by DA D2 receptor activation is attenuated by overexpressed  $\alpha$ -synuclein (Figure 7E). Two-way ANOVA analysis showed an effect of time  $F(17,221) = 4.961$  ( $p < 0.001$ ) and of group-by-time interaction  $F(17,221) = 2,402$  ( $p < 0.01$ ), but not of group. These results concur with previous findings suggesting that increased expression of  $\alpha$ -synuclein reduces neurotransmitter release.<sup>29</sup>

#### DISCUSSION

The present study confirms and extends previous studies by our group on the use of oligonucleotides (siRNA and ASO) conjugated with monoamine transporter inhibitors to selectively silence genes expressed by monoaminergic neurons *in vivo*.<sup>46-49</sup> The design of IND-conjugated oligonucleotides allowed us to selectively enrich them in DA, 5-HT, and NE neurons after i.n. Using this strategy, we were able to reduce the expression of  $\alpha$ -synuclein only in the monoaminergic neurons vulnerable to PD, with no signs of neuronal toxicity or compensatory mechanisms involving the expression of other members of the synuclein family.  $\alpha$ -Synuclein knockdown in monoaminergic nuclei was followed by increased DA and 5-HT neurotransmission in the forebrain areas examined: CPu and mPFC. These findings improve the current knowledge of the physiological role of  $\alpha$ -synuclein to regulate monoaminergic synaptic plasticity. But, more importantly, represent a major advance in the development of new therapies using non-viral inhibitory oligonucleotides to treat PD and other neurological diseases involving  $\alpha$ -synuclein accumulation.

The potential use of siRNA and ASO oligonucleotides as therapeutic tools has aroused a great deal of interest. However, this interest is greatly dampened by the difficulties into delivering these oligonucleotide molecules to the desired neurons/circuits in the mammalian brain. As previously reported,<sup>46-49</sup> our strategy was to develop conjugates of siRNA or ASO in which the oligonucleotide sequence was covalently bound to a triple inhibitor of monoamine transporters IND to selectively accumulate it in monoaminergic cells via monoamine transporters. The precise mechanism(s) by which IND-conjugated siRNA/ASO reaches DA, 5-HT, and NE neurons after i.n. are not fully understood. At least three potential pathways have been proposed for oligonucleotide transport to the brain following i.n.: (1) receptor-mediated endocytosis into olfactory sensory neurons followed by slow intracellular transport (from hours to days) to the olfactory bulb, (2) non-specific fluid-phase endocytosis into olfactory sensory neurons followed by intracellular transport to the olfactory bulb, and (3) extracellular diffusion into the olfactory submucosa along open intercellular clefts in the olfactory epithelium with rapid transport ( $\sim 30$  min) directly to the olfactory bulb or the olfactory subarachnoid space and CSF circulation<sup>57-59</sup> (Figure 2D). Therefore, conjugated siRNA/ASO molecules may use the extracellular pathway to be rapidly transported over large distances via CSF by pulsatile flow

## DA signaling in CPu

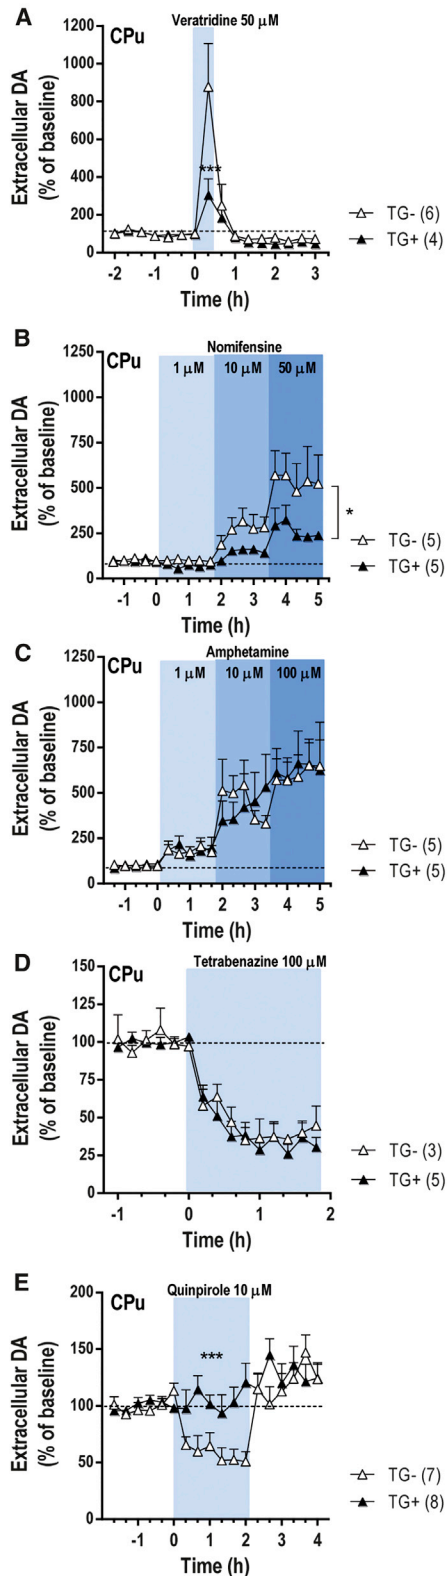

**Figure 7. Neurochemical Effects on Nigrostriatal DA Neurotransmission in Transgenic Mice Overexpressing  $\alpha$ -Synuclein**

Transgenic mice expressing human wild-type  $\alpha$ -synuclein cDNA under the control of TH promoter (TG<sup>+</sup>) and their respective controls (TG<sup>-</sup>) were implanted with a microdialysis probe into CPu. Microdialysis experiments were conducted between 1 and 3 days post-implantation. (A) Local veratridine infusion (depolarizing agent, 50  $\mu$ M) by reverse dialysis increased extracellular DA release in CPu, but this effect was more significant in TG<sup>-</sup> mice than in TG<sup>+</sup> mice. (B) Local nomifensine (DAT inhibitor, 1-10-50  $\mu$ M) application increased more significantly extracellular DA levels in CPu of TG<sup>-</sup> mice than in TG<sup>+</sup> mice. (C) However, local infusion of amphetamine (DA releaser, 1-10-100  $\mu$ M) increased striatal DA levels similarly in both phenotypes. (D) In addition, tetrabenazine (VMAT<sub>2</sub> inhibitor, 100  $\mu$ M) induced a comparable effect on striatal DA release in TG<sup>-</sup> and TG<sup>+</sup> mice. (E) Local activation of DA D<sub>2/3</sub> receptor in CPu by the infusion of 10  $\mu$ M quinpirole by reverse dialysis only reduced DA release in TG<sup>-</sup> mice, but not in TG<sup>+</sup> mice. The number of mice used in each experiment is shown in parentheses. \*p < 0.05, \*\*\*p < 0.001, compared with TG<sup>-</sup> mice (two-way ANOVA followed by Tukey's post hoc test). Data are mean  $\pm$  SEM. CPu, caudate putamen.

and then be taken up by the dense network of axons emerging from monoamine cell bodies that contain the greatest densities of SERT, DAT, and NET.<sup>60,61</sup> This possibility is supported by: (1) the absence of fluorescence-linked conjugated oligonucleotides in the projection brain areas closer to the administration site, as shown by previous<sup>46,48</sup> and present observations; (2) the short time required for IND-conjugated ASO to reach brainstem monoamine nuclei after i.n. (10–20 min); (3) the preferential extracellular concentration of conjugated ASO in the monoaminergic nuclei in a concentration gradient (DR > LC > SNc/VTA) that is consistent with *in vitro* affinity and *in vivo* occupancy of IND by the respective transporters (K<sub>i</sub> = 0.6, 2, and 4 nM for SERT, NET, and DAT, respectively);<sup>50</sup> and (4) the association of conjugated siRNA<sup>47,48</sup> or ASO (present study) with Rab5 and Rab7 in the monoamine neurons supporting endocytosis and intracellular traffic processes via early and late endomembrane compartments. Overall, our results demonstrate a selective and active accumulation of conjugated oligonucleotides in DA, 5-HT, and NE neurons.

After i.n., both 499-siRNA and 1233-ASO conjugated with IND and targeting a similar region of mRNA induced comparable  $\alpha$ -synuclein mRNA downregulation in the monoaminergic brainstem nuclei. However, the effect of IND-1233-ASO on  $\alpha$ -synuclein protein levels in the SNc/VTA was more sustained than that produced by IND-499-siRNA (72 versus 24 hr post-administration). Likewise, a decrease of striatal  $\alpha$ -synuclein protein density was evident after treatment with IND-1233-ASO, but not with IND-499-siRNA. Reduced  $\alpha$ -synuclein protein levels for 3 or more days are consistent with its half-life (48–54 hr) and indicate that stable and long-lasting reductions can be achieved.<sup>62,63</sup> Hence, in our *in vivo* model, the use of ASO may be more advantageous than that of siRNA in terms of a longer-lasting effect of the former on  $\alpha$ -synuclein knockdown. Previously, different silencing efficacies have been reported using siRNA and ASO *in vitro* and *in vivo*.<sup>64–66</sup> Both strategies powerfully knock down genes, and there is no clear evidence that the silencing is substantially stronger for either siRNA or ASO. The choice of the optimal mode will probably depend on the molecular mechanisms by which oligonucleotides



modulate RNA expression/function in brain cells. Indeed, ASO molecules have inherent advantages: (1) they are half the molecular weight of siRNAs; (2) they do not require hybridization, thus large-scale preparation of drugs is more straightforward; and (3) because endogenous duplex RNAs control important physiological processes, introducing synthetic siRNA may result in competition for binding to the RNA-induced silencing complex (RISC) and cause toxicity *in vivo*.<sup>67,68</sup> To the best of our knowledge, similar studies of ASOs showing competition for the RNase H enzyme and *in vivo* toxicity have not been reported.<sup>69</sup> In particular, three observations of the present study indicate that intranasal IND-1233-ASO treatment is safe and highly specific: (1) selective  $\alpha$ -synuclein silencing occurred only in monoamine neurons, leaving other genes expressed by these neuronal populations, including  $\beta$ - and  $\gamma$ -synuclein, unaffected; (2) it was functionally effective for at least 3 days post-treatment; and (3) there were no signs of cellular toxicity in DA neurons in the animals treated.

Interestingly, 1233-ASO was more effective *in vivo* than *in vitro* at reducing  $\alpha$ -synuclein expression; a difference that may be because of the experimental conditions used, such as the requirement for a delivery agent (e.g., lipofectamine) in the *in vitro*, but not in *in vivo*, studies.<sup>70</sup> Moreover, cultured cells were only briefly exposed to the 1233-ASO oligonucleotide, whereas *in vivo* experiments involved multiple doses of conjugated 1233-ASO, thereby allowing gradual intracellular accumulation of the oligonucleotides. Likewise, it was reported that cell systems with high gene expression are more susceptible to oligonucleotide-mediated silencing than low-expression cell systems,<sup>71</sup> as we also showed using M17-Syn cells overexpressing  $\alpha$ -synuclein (but not in M17-EV cells).

Downregulation of  $\alpha$ -synuclein in mouse monoamine neurons induced by intranasal IND-1233-ASO treatment enhanced DA and 5-HT neurotransmission in projection brain areas, such as CPU and mPFC (the effects on NE release were not assessed because of lack of adequate high performance liquid chromatography (HPLC) methods in our laboratory). Previous findings indicated that nigrostriatal terminals of  $\alpha$ -synuclein-deficient mice display a standard tonic DA activity after electrical stimulation with single pulses; however, they also exhibited increased DA release with paired stimuli that elevated  $Ca^{2+}$  levels.<sup>23</sup> The present data are in full agreement with those observations. Although  $\alpha$ -synuclein knockdown mice exhibited unchanged DA and 5-HT baseline values, the release of these neurotransmitters was increased by the depolarizing agent veratridine mainly in the striatum. An inverse effect on stimulated DA release was observed in the CPU of transgenic mice  $\alpha$ -synuclein overexpressing.

Moreover, recent studies showed that  $\alpha$ -synuclein inhibits exocytosis and the refilling of releasable synaptic vesicles.<sup>29,72</sup>  $\alpha$ -Synuclein modulates the SNARE-complex assembly in glutamatergic presynaptic terminals.<sup>28</sup> Although it is so far unclear whether monoaminergic terminals share the same mechanism of action,  $\alpha$ -synuclein probably

plays a dynamic role in regulating synaptic vesicle release or reuptake at the DA and 5-HT terminals. *In vitro* studies showed that  $\alpha$ -synuclein and  $\gamma$ -synuclein regulate the expression, trafficking, and function of monoamine transporters (DAT, SERT, and NET) at the cell surface.<sup>53,73</sup> In the present *in vivo* study, nomifensine (DAT inhibitor) and amphetamine (DA releaser and DAT inhibitor), as well as citalopram (SERT inhibitor), produced robust increases of DA and 5-HT levels, respectively, in the CPU and mPFC of  $\alpha$ -synuclein knockdown mice. Similarly, a decrease of striatal DA reuptake with a concomitant increase of extracellular DA levels was reported in  $\alpha$ -synuclein-deficient mice.<sup>74</sup> In contrast, striatal nomifensine application reduced extracellular DA levels by approximately 50% in mice overexpressing  $\alpha$ -synuclein, thereby suggesting that DAT function was markedly impaired in these animals. Together, this evidence confirms that  $\alpha$ -synuclein plays a key role in the regulation of monoamine reuptake function.

Early studies reported that the overexpression of mutant  $\alpha$ -synuclein variants also decreases VMAT<sub>2</sub> expression/function leading to increased cytosolic DA levels at the presynaptic terminals and resulting in DA neurotoxicity.<sup>53</sup> Our data showed that a moderate wild-type  $\alpha$ -synuclein downregulation (~20%–40% reduction) or overexpression (~2- to 3-fold increase) in monoamine neurons does not cause significant alteration of VMAT<sub>2</sub> function, as evaluated with tetrabenazine, and thereby that the physiological intracellular DA and 5-HT concentrations in projection areas of the brain are maintained.

A key observation in the present study is that the selective downregulation or upregulation of  $\alpha$ -synuclein expression evoked opposite changes in terminal autoreceptors controlling DA and 5-HT release, a crucial mechanism in the regulation of monoamine homeostasis.<sup>75–77</sup> The local administration of quinpirole (DA D<sub>2</sub> receptor agonist) or CP93139 (5-HT<sub>1B</sub> receptor agonist) induced a long-lasting reduction of DA and 5-HT release, respectively, in the CPU and mPFC of  $\alpha$ -synuclein knockdown mice. In contrast, quinpirole had no effect on striatal DA release in  $\alpha$ -synuclein-overexpressing transgenic mice. This reveals an interesting compensatory mechanism regulated by  $\alpha$ -synuclein, by which monoaminergic terminals can maintain functional extracellular DA and 5-HT activation of postsynaptic receptors in conditions of presynaptic deficit, such as that occurring in early PD stages when DA release is impaired.<sup>34,35</sup> So far, the cellular mechanism by which  $\alpha$ -synuclein affects the downstream signaling of monoaminergic receptors remains unclear. Notwithstanding, using whole-cell patch-clamp recordings from medium-sized striatal spiny neurons in slices of wild-type and  $\alpha$ -synuclein-overexpressing mice, it has been reported that quinpirole produces opposing effects on spontaneous excitatory postsynaptic currents (sEPSCs) mediated by the DA D<sub>2</sub> receptor leading to an altered DA efflux.<sup>78</sup> Likewise,  $\alpha$ -synuclein modified DA D<sub>2</sub>-agonist-mediated inhibition of adenylate cyclase, which consequently affected its downstream cAMP-responsive element (CRE)-mediated gene transcription in CHO cells transfected with DA D<sub>2</sub> receptors.<sup>79</sup> Altogether, this evidence confirms that

$\alpha$ -synuclein plays an essential physiological role as a fine-tuning regulator for the maintenance of monoaminergic plasticity.

In conclusion, the cellular selectivity and efficacy obtained with the intranasal IND-1233-ASO administration indicate that this may be a new approach to reduce  $\alpha$ -synuclein expression specifically in monoamine neurons, with a high translational value in the treatment of PD. In addition,  $\alpha$ -synuclein silencing would improve a deficit in DA and 5-HT neurotransmission in PD by enhancing monoamine release and/or reducing uptake. Notably, preliminary data showed that IND-1233-ASO induces a functional recovery of the nigro-striatal DA pathway in an animal PD model.<sup>80</sup> Overall, these effects would potentially delay the progression of PD symptomatology without serious deleterious effects.

## MATERIALS AND METHODS

### Small Interfering RNA and ASO Molecules

Three unmodified siRNA and ASO molecules targeting  $\alpha$ -synuclein were chosen for *in vitro* and *in vivo* studies. In addition, an unrelated siRNA duplex (nonsense siRNA [NS-siRNA]) or ASO (1227-ASO) with no homology to mouse genome were used as negative controls. Sequences of different oligonucleotides are shown in [Table S1](#). IND-conjugated siRNA or ASO targeting  $\alpha$ -synuclein or nonsense were synthesized by nLife Therapeutics (Granada, Spain) as previously reported.<sup>46,48</sup> Moreover, to study *in vivo* brain distribution and intracellular incorporation of IND-conjugated ASO into DA, 5-HT, and NE neurons, IND-1227-ASO and IND-1233-ASO were additionally bound to fluorophore Alexa 488 as previously reported by siRNA molecule.<sup>48</sup> Stock solutions of all siRNAs and ASOs were prepared in RNase-free water and stored at  $-20^{\circ}\text{C}$  until use. Details are shown in the [Supplementary Information](#).

### In Vitro Experiments

#### Cell Culture

M17 human neuroblastoma cells overexpressing  $\alpha$ -synuclein (M17-Syn) or the corresponding empty vector (M17-EV) were grown in Opti-MEM (GIBCO) medium supplemented with 10% fetal calf serum (FCS) and 0.5 mg/mL active Geneticin (GIBCO). Transfections were performed with 200 nM siRNAs or 300 nM ASOs in 24-well plates using lipofectamine RNAiMax (Invitrogen). Equal transfection efficiency in independent experiments was controlled by using BLOCK-IG Fluorescent Oligo (Invitrogen).

#### mRNA Extraction and RT-PCR

Isolation of mRNA was performed 24 hr post-transfection by the TRIzol (Invitrogen) following the manufacturer's protocol. In brief, cell pellets were lysed in 1 mL TRIZOL<sup>TM</sup> Reagent (Invitrogen) and frozen overnight to help homogenization. Then 0.2 mL chloroform was added and samples were centrifuged for 15 min at 10,000 rpm at  $4^{\circ}\text{C}$ . The aqueous supernatant was mixed with 0.5 mL isopropanol and centrifuged again for 20 min at 15,000 rpm at  $4^{\circ}\text{C}$ . Finally, isopropanol was replaced by 0.9 mL of cold 75% ethanol, and the samples were centrifuged for 5 min at 10,000 rpm at  $4^{\circ}\text{C}$ . Air-dried samples were re-suspended in RNase-free water,

and genomic DNA was removed by digestion with DNase I (QIAGEN). Total mRNA concentration was measured on a NanoDrop 200 (Thermo Fischer Scientific). One microgram of total mRNA was reverse-transcribed with Oligo dT by using SuperScript III first-strand synthesis system for RT-PCR (Invitrogen). After RNase treatment, cDNA was diluted to 8 ng/ $\mu\text{L}$  in 10 mM Tris-HCl (pH 8.0).

#### qRT-PCR

qRT-PCR was performed on a 7900HT SDS (Applied Biosystems) with TaqMan Universal Master Mix II with UNG (Roche Applied Biosystems) for detection using 20 ng of cDNA per reaction in a total volume of 10  $\mu\text{L}$ . The cycling conditions were as follows: 2 min at  $50^{\circ}\text{C}$  and 10 min at  $95^{\circ}\text{C}$ , followed by 40 cycles, each consisting of 15 s at  $95^{\circ}\text{C}$  and 1 min at  $60^{\circ}\text{C}$ . Fluorescence-labeled specific probes were used to detect the expression levels of the target genes  $\alpha$ - (SNCA-FAM, Hs00240907-m1),  $\beta$ - (SNCB-FAM, Hs00608185-m1), or  $\gamma$ -synuclein (SNCG-FAM, Hs00268306-m1), normalized against the housekeeping genes  $\beta$ -actin (FAM, 4333762F), RPLPO (VIC, 4326314E), and GADPH (FAM, 4333764F), all from Applied Biosystems. Threshold cycles (Ct) were calculated using the software ABI PRISM 7900HT SDS version 2.2 (Applied Biosystems). Relative quantification using the comparative Ct method was used to analyze the data output. Values were expressed as fold change over corresponding values for the control by the  $2^{-\Delta\Delta\text{Ct}}$  method.

#### Western Blot Analysis

M17-EV and M17-Syn cells grown on culture plates for 48 hr were harvested and centrifuged at 1500 rpm for 5 min. Pellets were washed with PBS three times. Lysis buffer (Tris-HCl 50 mM [pH 7.4], NaCl 150 mM, EDTA 1 mM, Triton X-100 1%) was added to the pellet and then incubated on ice for 30 min. Total protein concentration was determined using bicinchoninic acid (BCA) assay (Thermo Fisher Scientific). Thirty micrograms of protein was resolved by SDS-PAGE on 12% polyacrylamide gels and electrotransferred onto nitrocellulose membranes (GE Healthcare), which were blocked in 5% non-fat milk powder in PBS for 1 hr at room temperature and incubated overnight at  $4^{\circ}\text{C}$  with human  $\alpha$ -synuclein primary antibody (mouse monoclonal anti- $\alpha$ -synuclein [BD Biosciences], 610786, dilution 1:1,000). Incubation with the anti-mouse secondary antibody coupled to horseradish peroxidase (dilution 1:5,000; Amersham Bioscience) was performed at room temperature for 1 hr, followed by repeat washing with PBS. Immunoreactive bands were visualized using SuperSignal Femto Chemiluminescent Substrate (Pierce) according to manufacturer's instructions on an ImageQuant RT ECL imaging system (GE Healthcare).

### In Vivo Experiments

#### Animals

Wild-type male C57BL/6J mice (10–14 weeks; Charles River, Lyon, France) were housed under controlled conditions ( $22 \pm 1^{\circ}\text{C}$ ; 12 hr light/dark cycle) with food and water available *ad libitum*. Animal procedures were conducted in accordance with standard ethical guidelines (EU directive 2010/63 of September 22, 2010) and

approved by the local ethical committee. In addition, transgenic mice containing human wild-type  $\alpha$ -synuclein cDNA under the control of TH promoter (TG<sup>+</sup>) and their respective controls (TG<sup>-</sup>) on a C57BL/6 background were also used in microdialysis studies.<sup>55</sup>

### Treatments

For i.n., mice were slightly anesthetized by 2% isoflurane inhalation and placed in a supine position.<sup>46–48</sup> A 5- $\mu$ L drop of PBS or IND-conjugated siRNA or ASO molecules was applied alternatively to each nostril once daily. A total of 10  $\mu$ L of solution containing 30  $\mu$ g (2.3 nmol/day siRNA or 4.6 nmol/day ASO) of conjugated oligonucleotides was delivered for 4 days, and mice were killed at 1, 3, or 7 days after last administration.

### Western Blot Analysis

Mice (n = 8–10 per group) were sacrificed at all time points, brains were rapidly removed, and CPu and ventral midbrain were dissected and snap-frozen on dry ice. Tissues were homogenized in lysis buffer (Tris-EDTA-SDS-NP40 buffer) with protease inhibitors, and protein was quantified using a Pierce BCA protein assay kit (Thermo Fisher Scientific). A total of 10  $\mu$ g of protein per well in the presence of Laemmli buffer was loaded in a Mini-Protean TGX precast gel (Bio-Rad, Madrid, Spain). Electrophoresis was run 5 min at 80 V followed by 40 min at 120 V. Protein transfer was done using the Trans-blot turbo system (Bio-Rad) in 0.2- $\mu$ m polyvinylidene fluoride (PVDF) membranes. After transfer, membranes were blocked and incubated in primary antibodies (anti- $\alpha$ -synuclein, 1  $\mu$ g/mL, ab6162 [Abcam, Cambridge, UK]; anti- $\beta$ -actin, 0.2  $\mu$ g/mL, A5316 [Sigma-Aldrich, Madrid, Spain]; and anti-TH, 0.5  $\mu$ g/mL, AB152 [Sigma-Aldrich, Madrid, Spain]) overnight at 4°C. Secondary antibody incubation was done at room temperature during 1 hr in blocking solution (4% BSA in PBS-Tween 0.05%). Detection was done by chemiluminescence using SuperSignal Chemiluminescence ECL substrate kit (Thermo Fisher Scientific), and pictures were taken using ImageQuant LAS500 (GE Healthcare, Madrid, Spain). Images were analyzed using ImageJ software (<https://imagej.nih.gov/ij/>).

### In Situ Hybridization

Mice were killed by pentobarbital overdose, and brains were rapidly removed, frozen on dry ice, and stored at -80°C. Coronal tissue sections (14  $\mu$ m thick) were cut using a microtome-cryostat (HM500-OM; Microm, Walldorf, Germany), thaw-mounted onto 3-aminopropyltriethoxysilane (Sigma-Aldrich)-coated slides, and kept at -20°C until use. Antisense oligoprobes were complementary to bases:  $\alpha$ -synuclein/411-447 (GenBank: NM\_001042451),  $\beta$ -synuclein/1161-1194 (GenBank: NM\_033610.2),  $\gamma$ -synuclein/366-416 (GenBank: NM\_011430), DAT-DAT/564-614 (GenBank: NM\_010020), SERT-SERT/820-863 (GenBank: NM\_010484.1), and NET-NE/1210-1260 (GenBank: NM\_009209), respectively (Göttingen, Germany). Each oligoprobe was labeled (2 pmol) at the 3' end with [<sup>33</sup>P]-dATP (>2,500 Ci/mmol; DuPont-NEN, Boston, MA) using terminal deoxynucleotidyltransferase (TdT; Calbiochem, La Jolla, CA). Sections were hybridized as previously described.<sup>46,48</sup> Details are shown in the [Supplementary Information](#).

### Quantitative Image Analysis of Film Autoradiograms

Autoradiograms were analyzed and relative optical densities (RODs) were obtained using a computer-assisted image analyzer (MCID, Mering, Germany). For binding experiments, the system was calibrated with <sup>3</sup>H-microscales standards to obtain fmol/mg protein equivalents from ROD data. The slide background and non-specific densities were subtracted. ROD was evaluated in two to three duplicate adjacent sections from each mouse and averaged to obtain individual values. MCID system was also used to acquire pseudocolor images. Black-and-white photographs were taken from autoradiograms using a Wild 420 microscope (Leica, Heerbrugg, Germany) equipped with Nikon DXM1200F digital camera and ACT-1 Nikon software (Soft Imaging System, Münster, Germany). Figures were prepared for publication using Adobe Photoshop software (Adobe Software, San Jose, CA, USA). Contrast and brightness of images were the only variables we adjusted digitally.

### Immunohistochemistry

Mice were anesthetized with pentobarbital and transcardially perfused with 4% paraformaldehyde in sodium-phosphate buffer (pH 7.4). Brains were collected, post-fixed 24 hr at 4°C in the same solution, and then placed in gradient sucrose 10%–30% for 3 days at 4°C. For immunohistochemical procedures, 20- or 30- $\mu$ m-thick brain sections were inactivated with 1 $\times$  PBS containing 48% methanol and 1.5% H<sub>2</sub>O<sub>2</sub> for 25 min. After several 1 $\times$  PBS washes, tissues were blocked with normal serum from secondary antibody host in a 1 $\times$  PBS/0.2% Triton for 120 min. Then sections were rinsed with 1 $\times$  PBS/0.2% Triton and incubated at 4°C overnight with primary antibodies: anti-human  $\alpha$ -synuclein (1:20 for CPu, SNc/VTA, and LC; ab75305; Abcam, Cambridge, UK), anti- $\alpha$ -synuclein (1:2,500 for CPu, SNc/VTA, and LC; 610786; BD Biosciences, NJ, Franklin Lakes, USA; EEUU) or anti-TH (1:5,000; ab112; Abcam). Once washed with 1 $\times$  PBS/0.2% Triton, sections were incubated with the following biotinylated secondary antibodies: anti-mouse IgG1 (1:200; A-10519; Life Technologies, Carlsbad, CA, USA) for anti-human  $\alpha$ -synuclein and anti- $\alpha$ -synuclein, and anti-rabbit (1:200; BA-1000, Vector Laboratories, Burlingame, CA, USA) for anti-TH. Then tissues were incubated with 1% avidin/biotin complex (Vectastain Elite ABC Kit; Vector Laboratories) for 60 min. Finally, sections were washed and reacted for visualization using diaminobenzidine tetrahydrochloride (DAB; D5905-50TAB; Sigma-Aldrich) solution in a peroxidase reaction to produce a brown reaction product. Sections were mounted and embedded in Entellan (Electron Microscopy Sciences).

For quantitative morphology, the total number of TH<sup>+</sup> SNc neurons was assessed by stereology in regularly spaced 20- $\mu$ m-thick sections spanning the entire SNc using StereoInvestigator software (MBF Bioscience). In brief, SNc was delineated for each slide and probes for stereological counting were applied to the map obtained (size of counting frame was 100  $\times$  80  $\mu$ m spaced by 600  $\times$  400  $\mu$ m). Each TH<sup>+</sup> cell with its nucleus included within the counting frame was counted. Striatal TH innervation was assessed by ROD in regularly spaced 20- $\mu$ m-thick sections corresponding to different striatal



anatomical levels using Sigma Scan.<sup>81</sup> Sections were scanned using an Epson high-resolution scanner, and Sigma Scan software was used to compare the optical density in each region of interest.

### Confocal Fluorescence Microscopy

Intracellular IND-1227-ASO distribution in monoamine neurons was examined by confocal microscopy using a Leica TCS SP5 laser scanning confocal microscope (Leica Microsystems Heidelberg, Mannheim, Germany) equipped with a DMI6000 inverted microscope, blue diode (405 nm), argon (458/476/488/496/514), diode pumped solid-state (561 nm), and HeNe (594/633 nm) lasers. After *i.n.* administration with Alexa 488-labeled IND-1227-ASO at 30  $\mu\text{g}/\text{day}$  for 4 days, mice were sacrificed at 30 min or 6 hr, and their brain was extracted and processed for immunofluorescence. Details are shown in the [Supplemental Information](#).

### Drug and Reagents

All reagents used were of analytical grade and were obtained from Merck (Darmstadt, Germany). 5-HT oxalate, ( $\pm$ )-8-hydroxi-2 (dipropylamino)tetralin hydrobromide (8-OH-DPAT), DA hydrochloride, nomifensine maleate, (-)-quinpirole hydrochloride, and tetrabenazine were from Sigma-Aldrich-RBI (Madrid, Spain). Moreover, D-amphetamine sulfate, 1,4-dihydro-3-(1,2,3,6-tetrahydro-4-pyridinyl-5H-pyrrol[3,2-b] pyridine-5-one)-dihydro chloride (CP93129), citalopram hydrobromide, and veratridine were purchased from Tocris (Madrid, Spain). To assess local effects in microdialysis experiments, we dissolved drugs in aCSF (in mM: NaCl, 125; KCl, 2.5; CaCl<sub>2</sub>, 1.26; and MgCl<sub>2</sub>, 1.18) and administered by reverse dialysis at the stated concentrations (uncorrected for membrane recovery). Stock solutions of tetrabenazine and veratridine were made in DMSO and were diluted to appropriate concentrations in aCSF to reach 1% DMSO. All other drugs were dissolved in saline or aCSF, as required. Concentrated solutions (1 mM; pH adjusted to 6.5–7 with NaHCO<sub>3</sub> when necessary) were stored at  $-80^{\circ}\text{C}$ , and working solutions were prepared daily by dilution in aCSF.

### Microdialysis Procedures

Extracellular DA and 5-HT concentration were measured by *in vivo* microdialysis as previously described.<sup>46,82,83</sup> In brief, one concentric dialysis probe (Cuprophane membrane; 6,000 Da molecular weight cutoff; 1.5 mm long) was implanted in the CPu (coordinates in mm: anteroposterior [AP], +0.5; mediolateral [ML],  $-1.7$ ; dorsoventral [DV],  $-4.5$ ) or mPFC (AP, +2.2; ML,  $-0.2$ ; DV,  $-3.4$ ) of pentobarbital-anaesthetized mice.<sup>84</sup> Experiments were performed 24–48 hr after surgery in freely moving mice. Nomifensine (10–50  $\mu\text{M}$ ) or citalopram (1–50  $\mu\text{M}$ ), respectively, was added to aCSF to assess quinpirole, 8-OH-DPAT, CP93129, or tetrabenazine effects on extracellular DA or 5-HT levels. The aCSF was pumped (WPI model, SP220i) at 1.5  $\mu\text{L}/\text{min}$ , and 20-min samples were collected (except for the experiment using tetrabenazine, where aCSF was perfused at 3  $\mu\text{L}/\text{min}$  and collected 10-min samples). DA and 5-HT concentrations were analyzed by HPLC-amperometric detection (+0.75 and +0.6 V, respectively; Hewlett Packard 1049, Palo Alto, CA, USA) with 3-fmol detection limits. Baseline DA and

5-HT levels were calculated as the average of the five to six pre-drug samples.

In addition, we evaluated extracellular 1233-ASO concentration in a different mouse cohort after *i.n.* using *in vivo* microdialysis and stem-loop qRT-PCR detection. One concentric dialysis probe (Cuprophane membrane as above described; 1 or 1.5 mm long) was implanted in the CPu, SNC/VTA (AP,  $-3.0$ ; ML,  $-0.75$ ; DV,  $-5.0$ ), DR (AP,  $-4.5$ ; ML,  $-1.0$ ; DV,  $-4.2$  with a lateral angle of  $20^{\circ}$ ), or LC (AP,  $-5.4$ ; ML,  $-0.9$ ; DV,  $-3.5$ ).<sup>84</sup> Experiments were performed 24 hr after surgery. The aCSF was perfused at 3  $\mu\text{L}/\text{min}$ , and 10-min samples were collected. 1233-ASO concentration was quantified using stem-loop qPCR. Reverse transcription (RT) was performed directly on the samples using the SuperScript II Enzyme at a final concentration of 6.67 U/ $\mu\text{L}$  (18064-014; Invitrogen, ThermoFisher) and the antisense RT stem loop primer at a final concentration of 0.05  $\mu\text{M}$  (IDT, Coralville, IA, USA) on a Bio-Rad Thermocycler C1000 (Bio-Rad, Madrid, Spain). After the RT, 2  $\mu\text{L}$  of the reaction was mixed with Immolase DNA polymerase (final concentration of 0.04 U/ $\mu\text{L}$ ) and reaction buffer (BIO-21046; Biotline, London, UK) with the forward and reverse primers and probe (final concentrations of 1.5, 0.7, and 0.2  $\mu\text{M}$ , respectively) for the qPCR. The qPCR was performed in a LightCycler 480 System (Roche Molecular Systems, CA, USA).

### Statistical Analyses

All results are given as mean  $\pm$  SEM. Data were analyzed using GraphPad Prism 7.01 (San Diego, CA, USA). Statistical analyses were performed by two-tailed Student's t test and one-way or two-way ANOVA followed by Tukey's post hoc test as appropriate. Differences were considered significant when  $p < 0.05$ .

### SUPPLEMENTAL INFORMATION

Supplemental Information includes Supplemental Materials and Methods, 13 figures and two tables and can be found with this article online at <https://doi.org/10.1016/j.ymthe.2017.11.015>.

### AUTHOR CONTRIBUTIONS

R.R., M.V., and A.B. designed experiments and supervised the research. R.R., A.M., F.A., M.V., and A.B. designed the conjugated oligonucleotides. A.R. and I.C.-C. performed *in vitro* experiments. D.A.-A., M.G., A.F.-C., R.P.-C., N.Z., E.R.-B., R.C., and M.S. performed *in vivo* experiments. D.A.-A. and N.Z. performed microdialysis experiments. M.G. and E.R.-B. performed *in situ* hybridization experiments. A.F.-C. and R.P.-C. performed confocal microscopy experiments. R.C. and M.S. performed western blot experiments. I.F. provided the  $\alpha$ -synuclein transgenic mice. F.A., M.V., and A.B. wrote the manuscript, with all 13 authors providing input.

### CONFLICTS OF INTEREST

F.A., M.V., R.R., A.M., and A.B. are authors of the patent WO/2011/131693 for the siRNA and ASO (antisense oligonucleotides) molecules and the targeting approach related to this work. N.Z., R.C.,

M.S., R.R., and A.M. are board members of nLife Therapeutics S.L. The rest of authors declare no competing financial interest.

## ACKNOWLEDGMENTS

We thank María Calvo, Elisenda Coll, and Anna Bosch for outstanding technical support in the Confocal microscopy unit (CCiT-UB), and María C. Carmona for advice on design of small RNA and oligonucleotide molecules. We thank Letizia Campa, Verónica Paz, and Lluís Miquel for their excellent technical support. We would like to thank Theresa Branchek for her valuable comments on the manuscript. This work was supported by grant SAF2016-75797-R (to A.B.), INNPACTO Subprogram IPT-2012-1208-300000 (to A.B.), and Retos-Colaboración Subprogram RTC-2014-2812-1 (to M.V. and A.B.); Ministry of Economy and Competitiveness (MINECO) and European Regional Development Fund (ERDF), UE; grants PI13/01897 (to M.V.) and PI13/01390 (to A.B.), Fondo de Investigación Sanitaria-Instituto de Salud Carlos III (Spain), co-financed by ERDF; and Centro de Investigación Biomédica en Red de Salud Mental (CIBERSAM) and Centro de Investigación Biomédica en Red Enfermedades Neurodegenerativas (CIBERNED). CERCA Programme/Generalitat de Catalunya is also acknowledged.

## REFERENCES

- Braak, H., and Braak, E. (2000). Pathoanatomy of Parkinson's disease. *J. Neurol.* *247* (Suppl 2), II3–II10.
- Spillantini, M.G., Schmidt, M.L., Lee, V.M., Trojanowski, J.Q., Jakes, R., and Goedert, M. (1997). Alpha-synuclein in Lewy bodies. *Nature* *388*, 839–840.
- Spillantini, M.G., Crowther, R.A., Jakes, R., Hasegawa, M., and Goedert, M. (1998). alpha-Synuclein in filamentous inclusions of Lewy bodies from Parkinson's disease and dementia with lewy bodies. *Proc. Natl. Acad. Sci. USA* *95*, 6469–6473.
- Baba, M., Nakajo, S., Tu, P.H., Tomita, T., Nakaya, K., Lee, V.M., Trojanowski, J.Q., and Iwatsubo, T. (1998). Aggregation of alpha-synuclein in Lewy bodies of sporadic Parkinson's disease and dementia with Lewy bodies. *Am. J. Pathol.* *152*, 879–884.
- Satake, W., Nakabayashi, Y., Mizuta, I., Hirota, Y., Ito, C., Kubo, M., Kawaguchi, T., Tsunoda, T., Watanabe, M., Takeda, A., et al. (2009). Genome-wide association study identifies common variants at four loci as genetic risk factors for Parkinson's disease. *Nat. Genet.* *41*, 1303–1307.
- Simón-Sánchez, J., Schulte, C., Bras, J.M., Sharma, M., Gibbs, J.R., Berg, D., Paisan-Ruiz, C., Lichtner, P., Scholz, S.W., Hernandez, D.G., et al. (2009). Genome-wide association study reveals genetic risk underlying Parkinson's disease. *Nat. Genet.* *41*, 1308–1312.
- Edwards, T.L., Scott, W.K., Almonte, C., Burt, A., Powell, E.H., Beecham, G.W., Wang, L., Züchner, S., Konidari, I., Wang, G., et al. (2010). Genome-wide association study confirms SNPs in SNCA and the MAPT region as common risk factors for Parkinson disease. *Ann. Hum. Genet.* *74*, 97–109.
- Fuchs, J., Tichopad, A., Golub, Y., Munz, M., Schweitzer, K.J., Wolf, B., Berg, D., Mueller, J.C., and Gasser, T. (2008). Genetic variability in the SNCA gene influences alpha-synuclein levels in the blood and brain. *FASEB J.* *22*, 1327–1334.
- Chartier-Harlin, M.C., Kachergus, J., Roumier, C., Mouroux, V., Douay, X., Lincoln, S., Leveque, C., Larvor, L., Andrieux, J., Hulihan, M., et al. (2004). Alpha-synuclein locus duplication as a cause of familial Parkinson's disease. *Lancet* *364*, 1167–1169.
- Singleton, A.B., Farrer, M., Johnson, J., Singleton, A., Hague, S., Kachergus, J., Hulihan, M., Peuralinna, T., Dutra, A., Nussbaum, R., et al. (2003). alpha-Synuclein locus triplication causes Parkinson's disease. *Science* *302*, 841.
- Braak, H., Rüb, U., Gai, W.P., and Del Tredici, K. (2003). Idiopathic Parkinson's disease: possible routes by which vulnerable neuronal types may be subject to neuro-invasion by an unknown pathogen. *J. Neural Transm. (Vienna)* *110*, 517–536.
- Li, J.Y., Englund, E., Holton, J.L., Soulet, D., Hagell, P., Lees, A.J., Lashley, T., Quinn, N.P., Rehnacrona, S., Björklund, A., et al. (2008). Lewy bodies in grafted neurons in subjects with Parkinson's disease suggest host-to-graft disease propagation. *Nat. Med.* *14*, 501–503.
- Desplats, P., Lee, H.J., Bae, E.J., Patrick, C., Rockenstein, E., Crews, L., Spencer, B., Masliah, E., and Lee, S.J. (2009). Inclusion formation and neuronal cell death through neuron-to-neuron transmission of alpha-synuclein. *Proc. Natl. Acad. Sci. USA* *106*, 13010–13015.
- Kordower, J.H., and Brundin, P. (2009). Propagation of host disease to grafted neurons: accumulating evidence. *Exp. Neurol.* *220*, 224–225.
- Dehay, B., Vila, M., Bezard, E., Brundin, P., and Kordower, J.H. (2016). Alpha-synuclein propagation: new insights from animal models. *Mov. Disord.* *31*, 161–168.
- Stuendl, A., Kunadt, M., Kruse, N., Bartels, C., Moebius, W., Danzer, K.M., Mollenhauer, B., and Schneider, A. (2016). Induction of alpha-synuclein aggregate formation by CSF exosomes from patients with Parkinson's disease and dementia with Lewy bodies. *Brain* *139*, 481–494.
- Iwai, A., Masliah, E., Yoshimoto, M., Ge, N., Flanagan, L., de Silva, H.A., Kittel, A., and Saitoh, T. (1995). The precursor protein of non-A beta component of Alzheimer's disease amyloid is a presynaptic protein of the central nervous system. *Neuron* *14*, 467–475.
- George, J.M., Jin, H., Woods, W.S., and Clayton, D.F. (1995). Characterization of a novel protein regulated during the critical period for song learning in the zebra finch. *Neuron* *15*, 361–372.
- Murphy, D.D., Rueter, S.M., Trojanowski, J.Q., and Lee, V.M. (2000). Synucleins are developmentally expressed, and alpha-synuclein regulates the size of the presynaptic vesicular pool in primary hippocampal neurons. *J. Neurosci.* *20*, 3214–3220.
- Yavich, L., Tanila, H., Vepsäläinen, S., and Jäkälä, P. (2004). Role of alpha-synuclein in presynaptic dopamine recruitment. *J. Neurosci.* *24*, 11165–11170.
- Scott, D., and Roy, S. (2012). alpha-Synuclein inhibits intersynaptic vesicle mobility and maintains recycling-pool homeostasis. *J. Neurosci.* *32*, 10129–10135.
- Lashuel, H.A., Overk, C.R., Oueslati, A., and Masliah, E. (2013). The many faces of alpha-synuclein: from structure and toxicity to therapeutic target. *Nat. Rev. Neurosci.* *14*, 38–48.
- Abeliovich, A., Schmitz, Y., Fariñas, I., Choi-Lundberg, D., Ho, W.H., Castillo, P.E., Shinsky, N., Verdugo, J.M., Armanini, M., Ryan, A., et al. (2000). Mice lacking alpha-synuclein display functional deficits in the nigrostriatal dopamine system. *Neuron* *25*, 239–252.
- Cabin, D.E., Shimazu, K., Murphy, D., Cole, N.B., Gottschalk, W., McIlwain, K.L., Orrison, B., Chen, A., Ellis, C.E., Paylor, R., et al. (2002). Synaptic vesicle depletion correlates with attenuated synaptic responses to prolonged repetitive stimulation in mice lacking alpha-synuclein. *J. Neurosci.* *22*, 8797–8807.
- Dauer, W., Kholodilov, N., Vila, M., Trillat, A.C., Goodchild, R., Larsen, K.E., Staal, R., Tieu, K., Schmitz, Y., Yuan, C.A., et al. (2002). Resistance of alpha-synuclein null mice to the parkinsonian neurotoxin MPTP. *Proc. Natl. Acad. Sci. USA* *99*, 14524–14529.
- Chandra, S., Fornai, F., Kwon, H.B., Yazdani, U., Atasoy, D., Liu, X., Hammer, R.E., Battaglia, G., German, D.C., Castillo, P.E., and Südhof, T.C. (2004). Double-knockout mice for alpha- and beta-synucleins: effect on synaptic functions. *Proc. Natl. Acad. Sci. USA* *101*, 14966–14971.
- Robertson, D.C., Schmidt, O., Ninkina, N., Jones, P.A., Sharkey, J., and Buchman, V.L. (2004). Developmental loss and resistance to MPTP toxicity of dopaminergic neurons in substantia nigra pars compacta of gamma-synuclein, alpha-synuclein and double alpha/gamma-synuclein null mutant mice. *J. Neurochem.* *89*, 1126–1136.
- Burré, J., Sharma, M., Tsetsenis, T., Buchman, V., Etherton, M.R., and Südhof, T.C. (2010). Alpha-synuclein promotes SNARE-complex assembly in vivo and in vitro. *Science* *329*, 1663–1667.
- Nemani, V.M., Lu, W., Berge, V., Nakamura, K., Onoa, B., Lee, M.K., Chaudhry, F.A., Nicoll, R.A., and Edwards, R.H. (2010). Increased expression of alpha-synuclein reduces neurotransmitter release by inhibiting synaptic vesicle recluster after endocytosis. *Neuron* *65*, 66–79.
- Anwar, S., Peters, O., Millership, S., Ninkina, N., Doig, N., Connor-Robson, N., Threlfell, S., Kooner, G., Deacon, R.M., Bannerman, D.M., et al. (2011). Functional

- alterations to the nigrostriatal system in mice lacking all three members of the synuclein family. *J. Neurosci.* 31, 7264–7274.
31. Chadchankar, H., and Yavich, L. (2011). Sub-regional differences and mechanisms of the short-term plasticity of dopamine overflow in striatum in mice lacking alpha-synuclein. *Brain Res.* 1423, 67–76.
  32. Al-Wandi, A., Ninkina, N., Millership, S., Williamson, S.J., Jones, P.A., and Buchman, V.L. (2010). Absence of alpha-synuclein affects dopamine metabolism and synaptic markers in the striatum of aging mice. *Neurobiol. Aging* 31, 796–804.
  33. Lin, X., Parisiadou, L., Sgobio, C., Liu, G., Yu, J., Sun, L., Shim, H., Gu, X.L., Luo, J., Long, C.X., et al. (2012). Conditional expression of Parkinson's disease-related mutant  $\alpha$ -synuclein in the midbrain dopaminergic neurons causes progressive neurodegeneration and degradation of transcription factor nuclear receptor related 1. *J. Neurosci.* 32, 9248–9264.
  34. Lundblad, M., Decressac, M., Mattsson, B., and Björklund, A. (2012). Impaired neurotransmission caused by overexpression of  $\alpha$ -synuclein in nigral dopamine neurons. *Proc. Natl. Acad. Sci. USA* 109, 3213–3219.
  35. Janezic, S., Threlfell, S., Dodson, P.D., Dowie, M.J., Taylor, T.N., Potgieter, D., Parkkinen, L., Senior, S.L., Anwar, S., Ryan, B., et al. (2013). Deficits in dopaminergic transmission precede neuron loss and dysfunction in a new Parkinson model. *Proc. Natl. Acad. Sci. USA* 110, E4016–E4025.
  36. Hayashita-Kinoh, H., Yamada, M., Yokota, T., Mizuno, Y., and Mochizuki, H. (2006). Down-regulation of alpha-synuclein expression can rescue dopaminergic cells from cell death in the substantia nigra of Parkinson's disease rat model. *Biochem. Biophys. Res. Commun.* 341, 1088–1095.
  37. Junn, E., Lee, K.W., Jeong, B.S., Chan, T.W., Im, J.Y., and Mouradian, M.M. (2009). Repression of alpha-synuclein expression and toxicity by microRNA-7. *Proc. Natl. Acad. Sci. USA* 106, 13052–13057.
  38. Lewis, J., Melrose, H., Bumcrot, D., Hope, A., Zehr, C., Lincoln, S., Braithwaite, A., He, Z., Ogholikhan, S., Hinkle, K., et al. (2008). In vivo silencing of alpha-synuclein using naked siRNA. *Mol. Neurodegener.* 3, 19.
  39. Sapru, M.K., Yates, J.W., Hogan, S., Jiang, L., Halter, J., and Bohn, M.C. (2006). Silencing of human alpha-synuclein in vitro and in rat brain using lentiviral-mediated RNAi. *Exp. Neurol.* 198, 382–390.
  40. Doxakis, E. (2010). Post-transcriptional regulation of alpha-synuclein expression by mir-7 and mir-153. *J. Biol. Chem.* 285, 12726–12734.
  41. Zharikov, A.D., Cannon, J.R., Tapias, V., Bai, Q., Horowitz, M.P., Shah, V., El Ayadi, A., Hastings, T.G., Greenamyre, J.T., and Burton, E.A. (2015). shRNA targeting  $\alpha$ -synuclein prevents neurodegeneration in a Parkinson's disease model. *J. Clin. Invest.* 125, 2721–2735.
  42. Recasens, A., Perier, C., and Sue, C.M. (2016). Role of microRNAs in the regulation of  $\alpha$ -synuclein expression: a systematic review. *Front. Mol. Neurosci.* 9, 128.
  43. Gorbatyuk, O.S., Li, S., Nash, K., Gorbatyuk, M., Lewin, A.S., Sullivan, L.F., Mandel, R.J., Chen, W., Meyers, C., Manfredsson, F.P., and Muzyczka, N. (2010). In vivo RNAi-mediated  $\alpha$ -synuclein silencing induces nigrostriatal degeneration. *Mol. Ther.* 18, 1450–1457.
  44. Khodr, C.E., Sapru, M.K., Pedapati, J., Han, Y., West, N.C., Kells, A.P., Bankiewicz, K.S., and Bohn, M.C. (2011). An  $\alpha$ -synuclein AAV gene silencing vector ameliorates a behavioral deficit in a rat model of Parkinson's disease, but displays toxicity in dopamine neurons. *Brain Res.* 1395, 94–107.
  45. Collier, T.J., Redmond, D.E., Jr., Steece-Collier, K., Lipton, J.W., and Manfredsson, F.P. (2016). Is alpha-synuclein loss-of-function a contributor to Parkinsonian pathology? Evidence from non-human primates. *Front. Neurosci.* 10, 12.
  46. Bortolozzi, A., Castañé, A., Semakova, J., Santana, N., Alvarado, G., Cortés, R., Ferrés-Coy, A., Fernández, G., Carmona, M.C., Toth, M., et al. (2012). Selective siRNA-mediated suppression of 5-HT1A autoreceptors evokes strong anti-depressant-like effects. *Mol. Psychiatry* 17, 612–623.
  47. Ferrés-Coy, A., Ruiz-Bronchal, E., Paz, V., Galofré, M., Artigas, F., and Bortolozzi, A. (2014). Selective siRNA-mediated suppression of TASK3 channels in monoaminergic neurons: a new antidepressant target. *Neuroscience 2014 Annual Meeting, Poster 322.04/Y21, Society for Neuroscience, November 15–19, 2014, Washington, DC.*
  48. Ferrés-Coy, A., Galofré, M., Pilar-Cuellar, F., Vidal, R., Paz, V., Ruiz-Bronchal, E., Campa, L., Pazos, Á., Caso, J.R., Leza, J.C., et al. (2016). Therapeutic antidepressant potential of a conjugated siRNA silencing the serotonin transporter after intranasal administration. *Mol. Psychiatry* 21, 328–338.
  49. Artigas, F., and Bortolozzi, A. (2017). Therapeutic potential of conjugated siRNAs for the treatment of major depressive disorder. *Neuropsychopharmacology* 42, 371.
  50. Lengyel, K., Pieschl, R., Strong, T., Molski, T., Mattson, G., Lodge, N.J., and Li, Y.W. (2008). Ex vivo assessment of binding site occupancy of monoamine reuptake inhibitors: methodology and biological significance. *Neuropharmacology* 55, 63–70.
  51. Krupp, J.L., and Bernards, C.M. (2004). Pharmacokinetics of intrathecal oligodeoxynucleotides. *Anesthesiology* 100, 315–322.
  52. Hurley, J., Roberts, D., Bond, A., Keys, D., and Chen, C. (2012). Stem-loop RT-qPCR for microRNA expression profiling. *Methods Mol. Biol.* 822, 33–52.
  53. Sidhu, A., Wersinger, C., and Vernier, P. (2004). Does alpha-synuclein modulate dopaminergic synaptic content and tone at the synapse? *FASEB J.* 18, 637–647.
  54. Zhou, Z., Kim, J., Insolera, R., Peng, X., Fink, D.J., and Mata, M. (2011). Rho GTPase regulation of  $\alpha$ -synuclein and VMAT2: implications for pathogenesis of Parkinson's disease. *Mol. Cell. Neurosci.* 48, 29–37.
  55. Pérez-Sánchez, F., Milán, M., Buendía, P., Cano-Jaimez, M., Ambrosio, S., Rosenthal, A., and Fariñas, I. (2010). Prosurvival effect of human wild-type alpha-synuclein on MPTP-induced toxicity to central but not peripheral catecholaminergic neurons isolated from transgenic mice. *Neuroscience* 167, 261–276.
  56. Sánchez-Danés, A., Richaud-Patin, Y., Carballo-Carbajal, I., Jiménez-Delgado, S., Caig, C., Mora, S., Di Guglielmo, C., Ezquerro, M., Patel, B., Giral, A., et al. (2012). Disease-specific phenotypes in dopamine neurons from human iPS-based models of genetic and sporadic Parkinson's disease. *EMBO Mol. Med.* 4, 380–395.
  57. Dhuria, S.V., Hanson, L.R., and Frey, W.H., 2nd (2010). Intranasal delivery to the central nervous system: mechanisms and experimental considerations. *J. Pharm. Sci.* 99, 1654–1673.
  58. Lochhead, J.J., and Thorne, R.G. (2012). Intranasal delivery of biologics to the central nervous system. *Adv. Drug Deliv. Rev.* 64, 614–628.
  59. Renner, D.B., Frey, W.H., 2nd, and Hanson, L.R. (2012). Intranasal delivery of siRNA to the olfactory bulbs of mice via the olfactory nerve pathway. *Neurosci. Lett.* 513, 193–197.
  60. Javitch, J.A., Strittmatter, S.M., and Snyder, S.H. (1985). Differential visualization of dopamine and norepinephrine uptake sites in rat brain using [<sup>3</sup>H]mazindol autoradiography. *J. Neurosci.* 5, 1513–1521.
  61. Cortés, R., Soriano, E., Pazos, A., Probst, A., and Palacios, J.M. (1988). Autoradiography of antidepressant binding sites in the human brain: localization using [<sup>3</sup>H]imipramine and [<sup>3</sup>H]paroxetine. *Neuroscience* 27, 473–496.
  62. Okochi, M., Walter, J., Koyama, A., Nakajo, S., Baba, M., Iwatsubo, T., Meijer, L., Kahle, P.J., and Haass, C. (2000). Constitutive phosphorylation of the Parkinson's disease associated alpha-synuclein. *J. Biol. Chem.* 275, 390–397.
  63. Tofaris, G.K., Layfield, R., and Spillantini, M.G. (2001). alpha-Synuclein metabolism and aggregation is linked to ubiquitin-independent degradation by the proteasome. *FEBS Lett.* 509, 22–26.
  64. Bertrand, J.R., Pottier, M., Vekris, A., Opolon, P., Maksimenko, A., and Malvy, C. (2002). Comparison of antisense oligonucleotides and siRNAs in cell culture and in vivo. *Biochem. Biophys. Res. Commun.* 296, 1000–1004.
  65. Senn, C., Hangartner, C., Moes, S., Guerini, D., and Hofbauer, K.G. (2005). Central administration of small interfering RNAs in rats: a comparison with antisense oligonucleotides. *Eur. J. Pharmacol.* 522, 30–37.
  66. Corey, D.R. (2007). RNA learns from antisense. *Nat. Chem. Biol.* 3, 8–11.
  67. Grimm, D., Streetz, K.L., Jopling, C.L., Storm, T.A., Pandey, K., Davis, C.R., Marion, P., Salazar, F., and Kay, M.A. (2006). Fatality in mice due to oversaturation of cellular microRNA/short hairpin RNA pathways. *Nature* 441, 537–541.
  68. Koller, E., Propp, S., Murray, H., Lima, W., Bhat, B., Prakash, T.P., Allerson, C.R., Swayze, E.E., Marcusson, E.G., and Dean, N.M. (2006). Competition for RISC binding predicts in vitro potency of siRNA. *Nucleic Acids Res.* 34, 4467–4476.
  69. Southwell, A.L., Skotte, N.H., Bennett, C.F., and Hayden, M.R. (2012). Antisense oligonucleotide therapeutics for inherited neurodegenerative diseases. *Trends Mol. Med.* 18, 634–643.



70. Juliano, R., Alam, M.R., Dixit, V., and Kang, H. (2008). Mechanisms and strategies for effective delivery of antisense and siRNA oligonucleotides. *Nucleic Acids Res.* 36, 4158–4171.
71. Hong, S.W., Jiang, Y., Kim, S., Li, C.J., and Lee, D.K. (2014). Target gene abundance contributes to the efficiency of siRNA-mediated gene silencing. *Nucleic Acid Ther.* 24, 192–198.
72. Sulzer, D. (2010). Clues to how alpha-synuclein damages neurons in Parkinson's disease. *Mov. Disord.* 25 (Suppl 1), S27–S31.
73. Oaks, A.W., and Sidhu, A. (2011). Synuclein modulation of monoamine transporters. *FEBS Lett.* 585, 1001–1006.
74. Chadchankar, H., Ihalaenen, J., Tanila, H., and Yavich, L. (2011). Decreased reuptake of dopamine in the dorsal striatum in the absence of  $\alpha$ -synuclein. *Brain Res.* 1382, 37–44.
75. Adell, A., Celada, P., and Artigas, F. (2001). The role of 5-HT<sub>1B</sub> receptors in the regulation of serotonin cell firing and release in the rat brain. *J. Neurochem.* 79, 172–182.
76. Sokoloff, P., Guillin, O., Diaz, J., Carroll, P., and Griffon, N. (2002). Brain-derived neurotrophic factor controls dopamine D3 receptor expression: implications for neurodevelopmental psychiatric disorders. *Neurotox. Res.* 4, 671–678.
77. Bortolozzi, A., Amargós-Bosch, M., Toth, M., Artigas, F., and Adell, A. (2004). In vivo efflux of serotonin in the dorsal raphe nucleus of 5-HT<sub>1A</sub> receptor knockout mice. *J. Neurochem.* 88, 1373–1379.
78. Lam, H.A., Wu, N., Cely, I., Kelly, R.L., Hean, S., Richter, F., Magen, I., Cepeda, C., Ackerson, L.C., Walwyn, W., et al. (2011). Elevated tonic extracellular dopamine concentration and altered dopamine modulation of synaptic activity precede dopamine loss in the striatum of mice overexpressing human  $\alpha$ -synuclein. *J. Neurosci. Res.* 89, 1091–1102.
79. Kim, S.J., Kim, S.Y., Na, Y.S., Lee, H.J., Chung, K.C., and Baik, J.H. (2006). Alpha-synuclein enhances dopamine D2 receptor signaling. *Brain Res.* 1124, 5–9.
80. Alarcón-Arís, D., Ruiz-Bronchal, E., Montefeltro, A., Artigas, F., and Bortolozzi, A. (2016). Antisense oligonucleotide-induced reduction of human alpha-synuclein accumulation in dopamine and serotonin neurons prevents early dysfunctions in a mouse model of Parkinson's disease. *Neuroscience 2016 Annual Meeting, Poster 602.03/T12*, Society for Neuroscience, November 12–16, 2016, San Diego, CA.
81. Dehay, B., Bové, J., Rodríguez-Muela, N., Perier, C., Recasens, A., Boya, P., and Vila, M. (2010). Pathogenic lysosomal depletion in Parkinson's disease. *J. Neurosci.* 30, 12535–12544.
82. Díaz-Mataix, L., Scorza, M.C., Bortolozzi, A., Toth, M., Celada, P., and Artigas, F. (2005). Involvement of 5-HT<sub>1A</sub> receptors in prefrontal cortex in the modulation of dopaminergic activity: role in atypical antipsychotic action. *J. Neurosci.* 25, 10831–10843.
83. Bortolozzi, A., Masana, M., Díaz-Mataix, L., Cortés, R., Scorza, M.C., Gingrich, J.A., Toth, M., and Artigas, F. (2010). Dopamine release induced by atypical antipsychotics in prefrontal cortex requires 5-HT(1A) receptors but not 5-HT(2A) receptors. *Int. J. Neuropsychopharmacol.* 13, 1299–1314.
84. Franklin, K.B.J., and Paxinos, G. (2008). *The Mouse Brain in Stereotaxic Coordinates* (Academic Press).

## **Supplemental Information**

### **Selective $\alpha$ -Synuclein Knockdown in Monoamine**

### **Neurons by Intranasal Oligonucleotide Delivery:**

### **Potential Therapy for Parkinson's Disease**

**Diana Alarcón-Arís, Ariadna Recasens, Mireia Galofré, Iria Carballo-Carbajal, Nicolás Zacchi, Esther Ruiz-Bronchal, Rubén Pavia-Collado, Rosario Chica, Albert Ferrés-Coy, Marina Santos, Raquel Revilla, Andrés Montefeltro, Isabel Fariñas, Francesc Artigas, Miquel Vila, and Analia Bortolozzi**

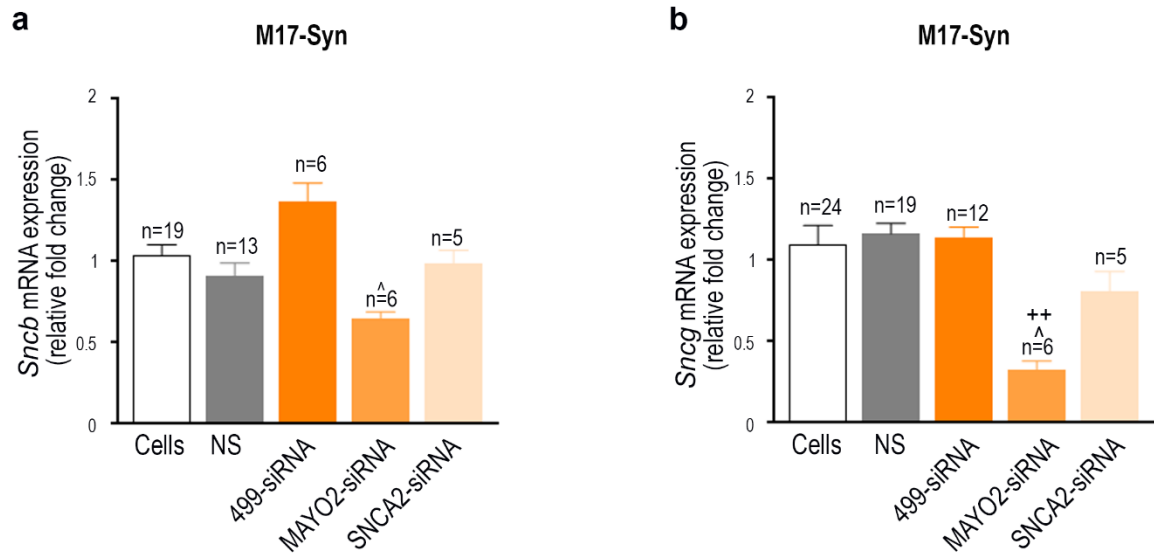

**Figure S1. 499-siRNA does not suppress  $\beta$ - nor  $\gamma$ -synuclein expression in M17 cells overexpressing human  $\alpha$ -synuclein (M17-Syn)**

(a-b) RT-qPCR quantification of *Sncb* (a) and *Sncg* (b) expression in M17-Syn 24h after transfection with 499-siRNA, MAYO2-siRNA and SNCA2-siRNA. Cells transfected with nonsense siRNA (NS) were used as control. Target gene expression was normalized to two different housekeeping genes: GAPDH and RPLPO. In all graphs, histograms represent average  $\pm$  SEM.  $^{\wedge}P < 0.05$  compared with cells + lipofectamine;  $^{++}P < 0.01$  compared with NS-siRNA (One-way ANOVA followed by Tukey's *post-hoc* test). M17-Syn, M17 human neuroblastoma cells overexpressing  $\alpha$ -synuclein. 499-siRNA, MAYO2-siRNA or SNCA2-siRNA are siRNA sequences designed to target regions of the *Snc* mRNA encoding  $\alpha$ -synuclein protein (Table S1 shows siRNA sequences).



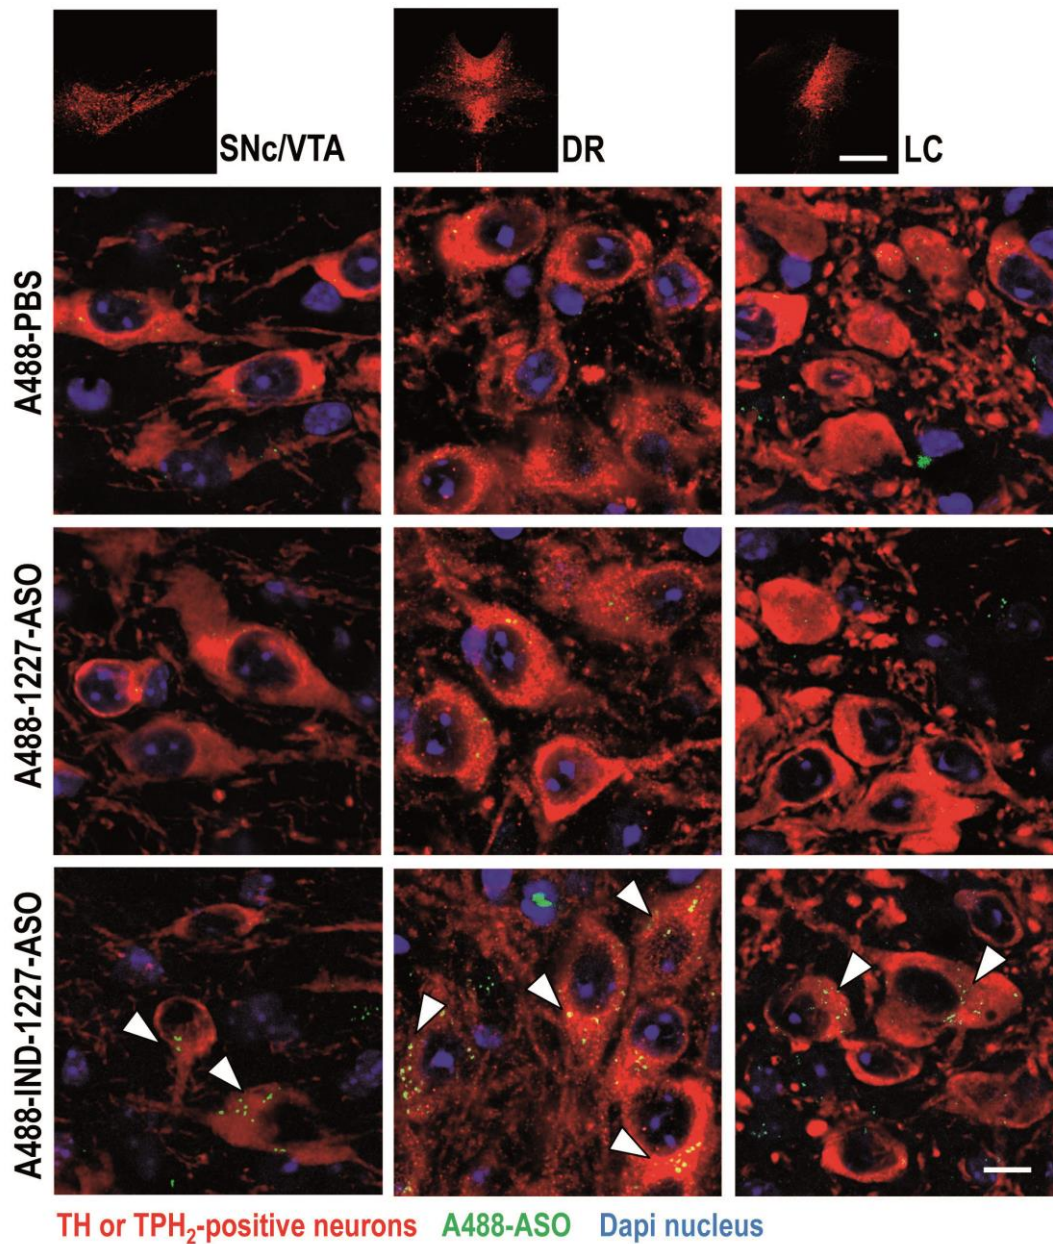

**Figure S2. Preferential accumulation of indatraline-conjugated ASO molecules in monoamine neurons after intranasal administration**

Mice were intranasally administered with alexa488 PBS (A488-PBS), alexa488-labeled nonsense 1227-ASO (A488-1227-ASO) or alexa488-labeled indatraline-conjugated 1227-ASO (A488-IND-1227-ASO) at 30  $\mu\text{g}/\text{day}$  for 4 days and were sacrificed 6h after last administration (n=3 mice/group, new mouse cohort different from those used in the Figure 2). Confocal images showing co-localization of A488-IND-1227-ASO (yellow) with TH-positive neurons (red) in SNc/VTA and LC or TPH<sub>2</sub>-positive neurons (red) in DR identified with white arrowheads. Cell nuclei were stained with Dapi (blue). Scarce or null co-localization of A488-1227-ASO with TH-positive or TPH<sub>2</sub>-positive neurons was detected. Scale bars: low=200  $\mu\text{m}$ , high=10  $\mu\text{m}$ . SNc/VTA, substantia nigra compacta/ventral tegmental area; DR, dorsal raphe nucleus; LC, locus coeruleus.

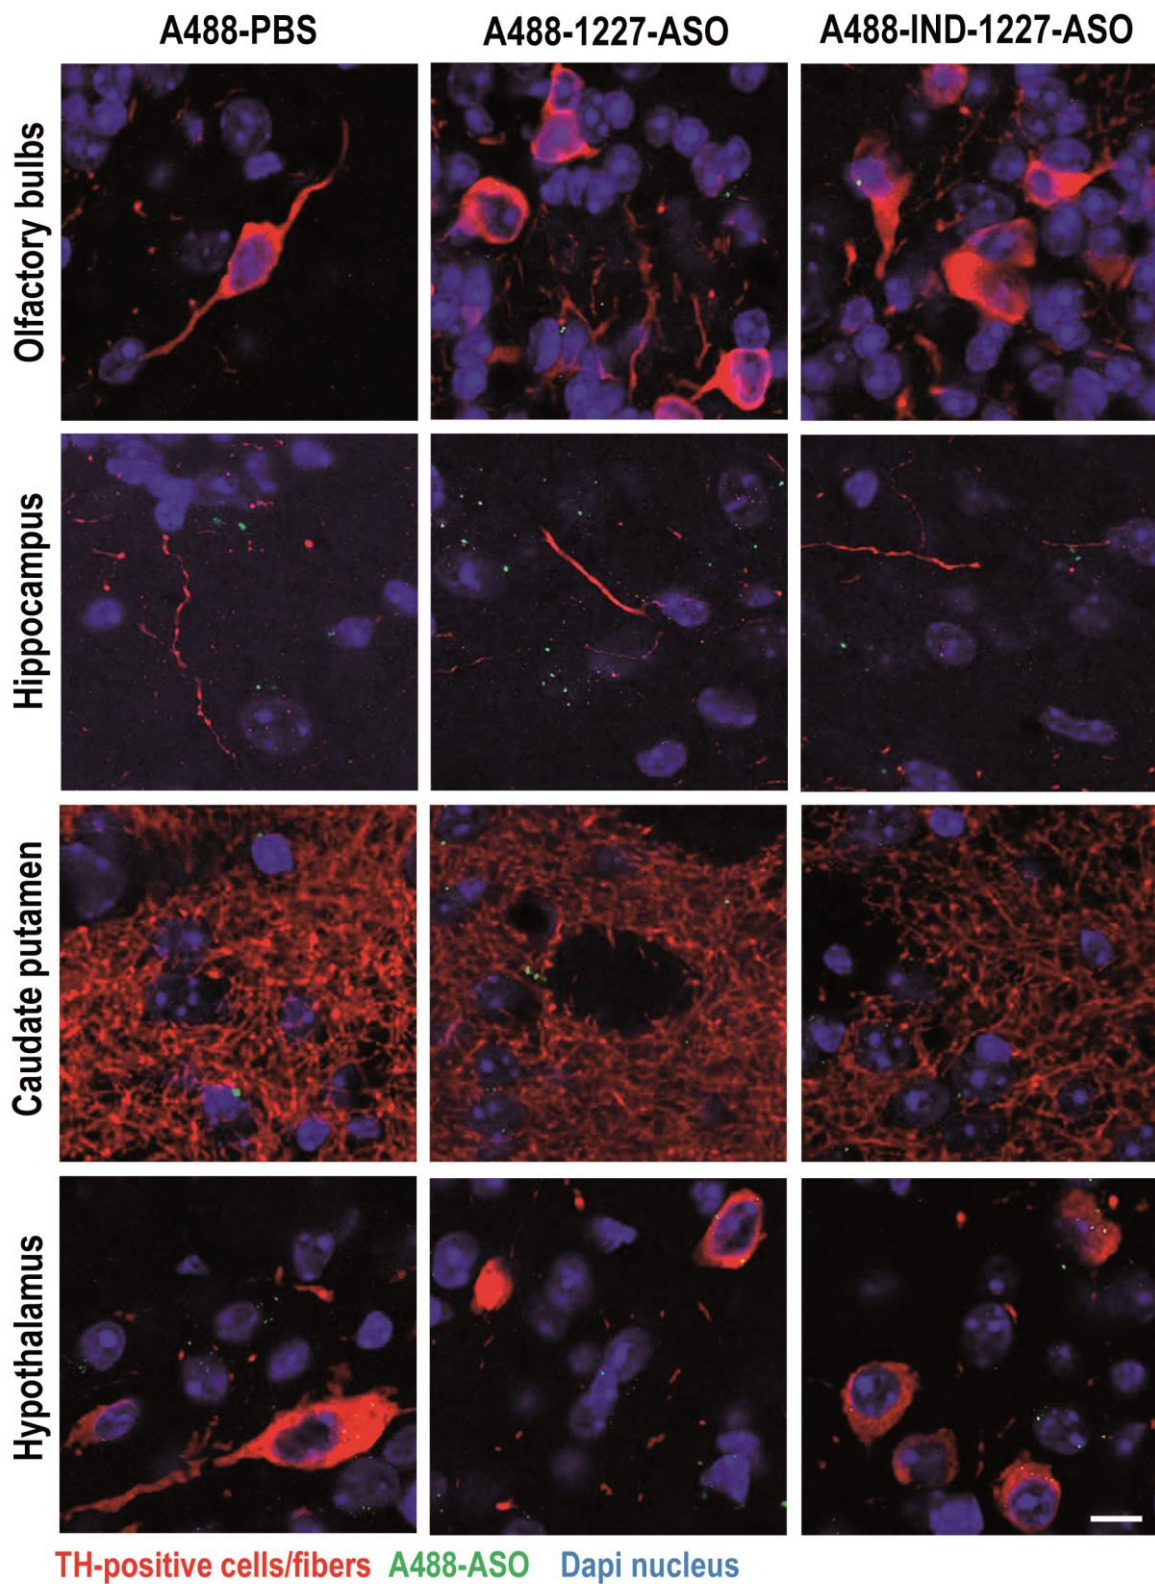

**Figure S3. Absence of indatraline-conjugated nonsense-ASO (IND-1227-ASO) molecules in olfactory bulbs, hippocampus, caudate putamen and hypothalamus of mice**

Laser confocal images show cell nuclei stained with Dapi (blue) in the different brain areas of mice treated intranasally with Alexa488 PBS (A488-PBS), alexa488-labeled 1227-ASO (A488-1227-ASO) or alexa488-labeled indatraline-conjugated 1227-ASO (A488-IND-1227-ASO) at 30  $\mu\text{g}/\text{day}$  during 4 days (n=3 mice/group, the same mice as in Figure 3). Scale bars: 50  $\mu\text{m}$ .



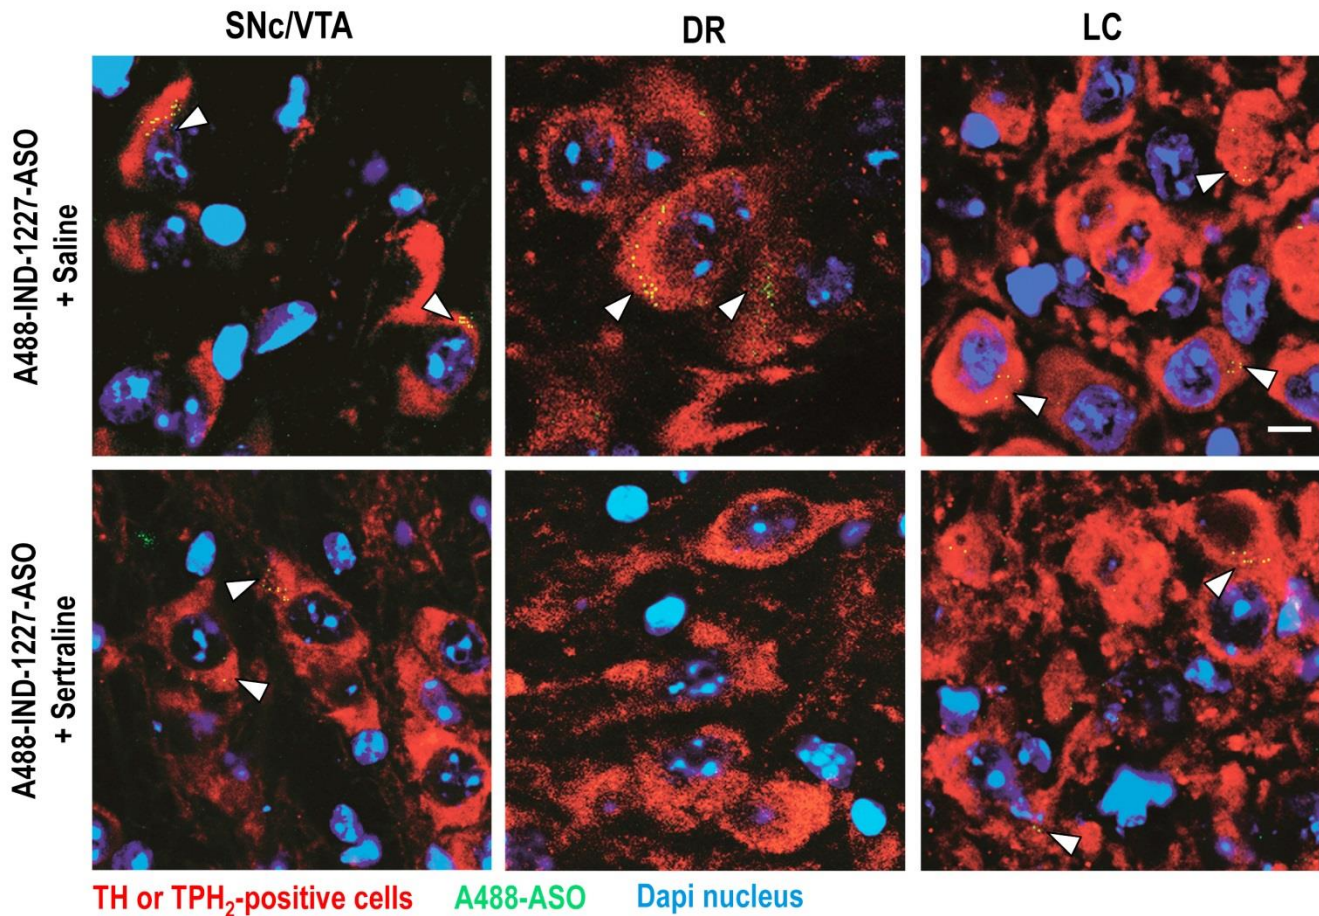

**Figure S4. Effect of sertraline SERT inhibitor on *in vivo* cellular uptake of indatraline-conjugated nonsense-ASO (IND-1227-ASO) into 5-HT neurons**

Mice were pretreated with: a) sertraline 20 mg/kg, i.p. (selective SERT inhibitor) or b) saline solution, i.p. for 3 h before the i.n. administration of IND-1227-ASO at 30 µg/day for 4 days. Mice were sacrificed 6h after last administration of IND-1227-ASO (n=3 mice/group). Representative confocal images showing the co-localization of A488-IND-1227-ASO (yellow) with TH-positive neurons (red) in SNc/VTA and LC or TPH<sub>2</sub>-positive neurons (red) in DR identified with white arrowheads (Top panel, images are the same as in Figure 2a). Representative confocal images showing co-localization of A488-IND-1227-ASO (yellow) with TH-positive neurons (red) in SNc/VTA and LC, but not with TPH<sub>2</sub>-positive neurons (red) in DR (Down panel). Cell nuclei were stained with Dapi (blue). As seem, the accumulation of IND-1227-ASO in TPH<sub>2</sub>-positive 5-HT neurons was completely blocked by sertraline indicating that SERT is a requirement to uptake of oligonucleotide. Scale bars: 10 µm. SNc/VTA, substantia nigra compacta/ventral tegmental area; DR, dorsal raphe nucleus; LC, locus coeruleus; SERT, serotonin transporter; 5-HT, serotonin.



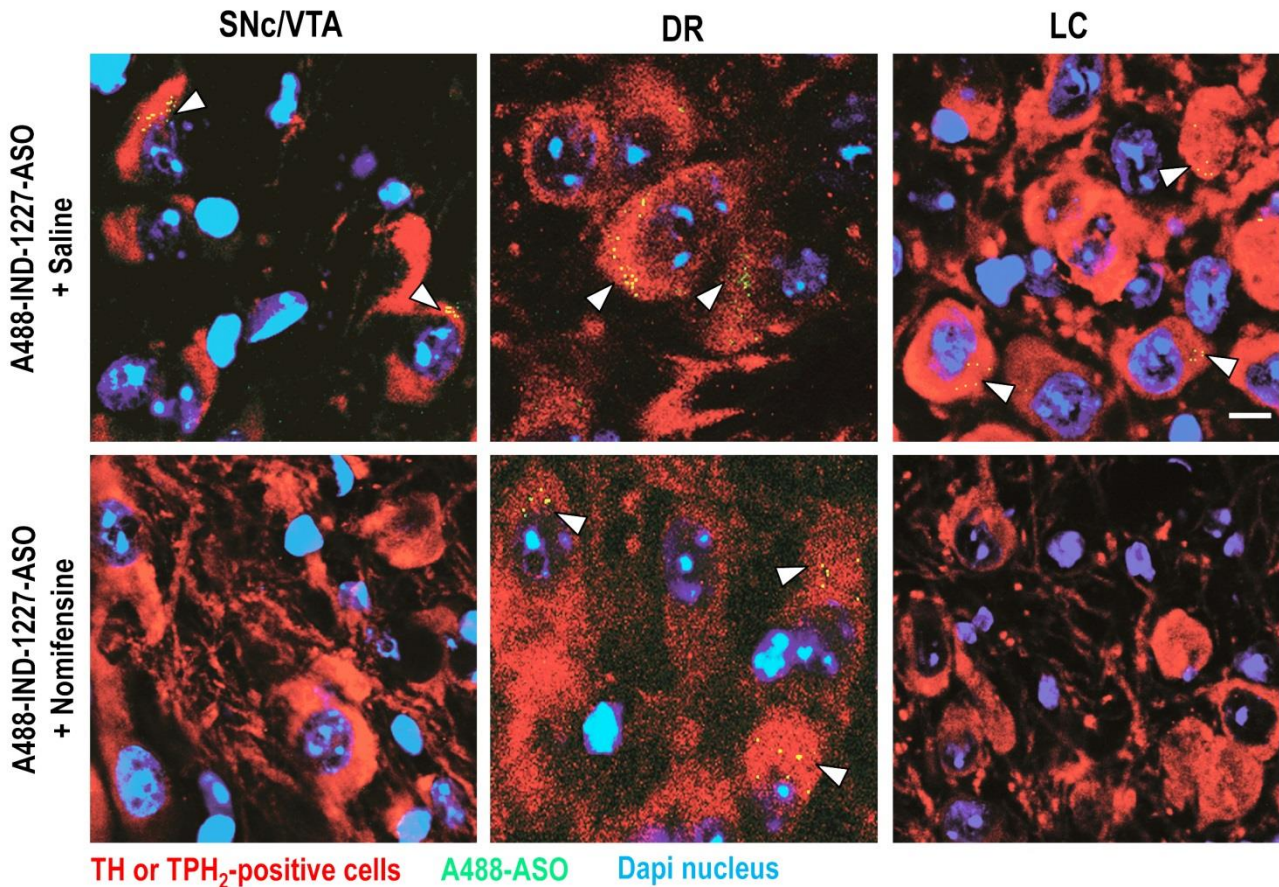

**Figure S5. Effect of nomifensine DAT/NET inhibitor on *in vivo* cellular uptake of indatraline-conjugated nonsense-ASO (IND-1227-ASO) into DA and NE neurons**

Mice were pretreated with: a) nomifensine 20 mg/kg, i.p. (DAT/NET inhibitor) or b) saline solution, i.p. for 3 h before the i.n. administration of IND-1227-ASO at 30  $\mu$ g/day for 4 days. Mice were sacrificed 6h after last administration of IND-1227-ASO (n=3 mice/group). Representative confocal images showing the co-localization of A488-IND-1227-ASO (yellow) with TH-positive neurons (red) in SNc/VTA and LC or TPH<sub>2</sub>-positive neurons (red) in DR identified with white arrowheads (Top panel, images are the same as in Figure 2a). Representative confocal images showing co-localization of A488-IND-1227-ASO (yellow) with TPH<sub>2</sub>-positive neurons (red) in DR, but not with TH-positive neurons (red) in SNc/VTA and LC (Down panel). Cell nuclei were stained with Dapi (blue). As seem, the accumulation of IND-1227-ASO in TH-positive DA or NE neurons was completely blocked by nomifensine indicating that DAT and NET are a requirement to uptake of oligonucleotide. Scale bars: 10  $\mu$ m. SNc/VTA, substantia nigra compacta/ventral tegmental area; DR, dorsal raphe nucleus; LC, locus coeruleus; DAT, dopamine transporter; NET, norepinephrine transporter; DA, dopamine; NE, norepinephrine.

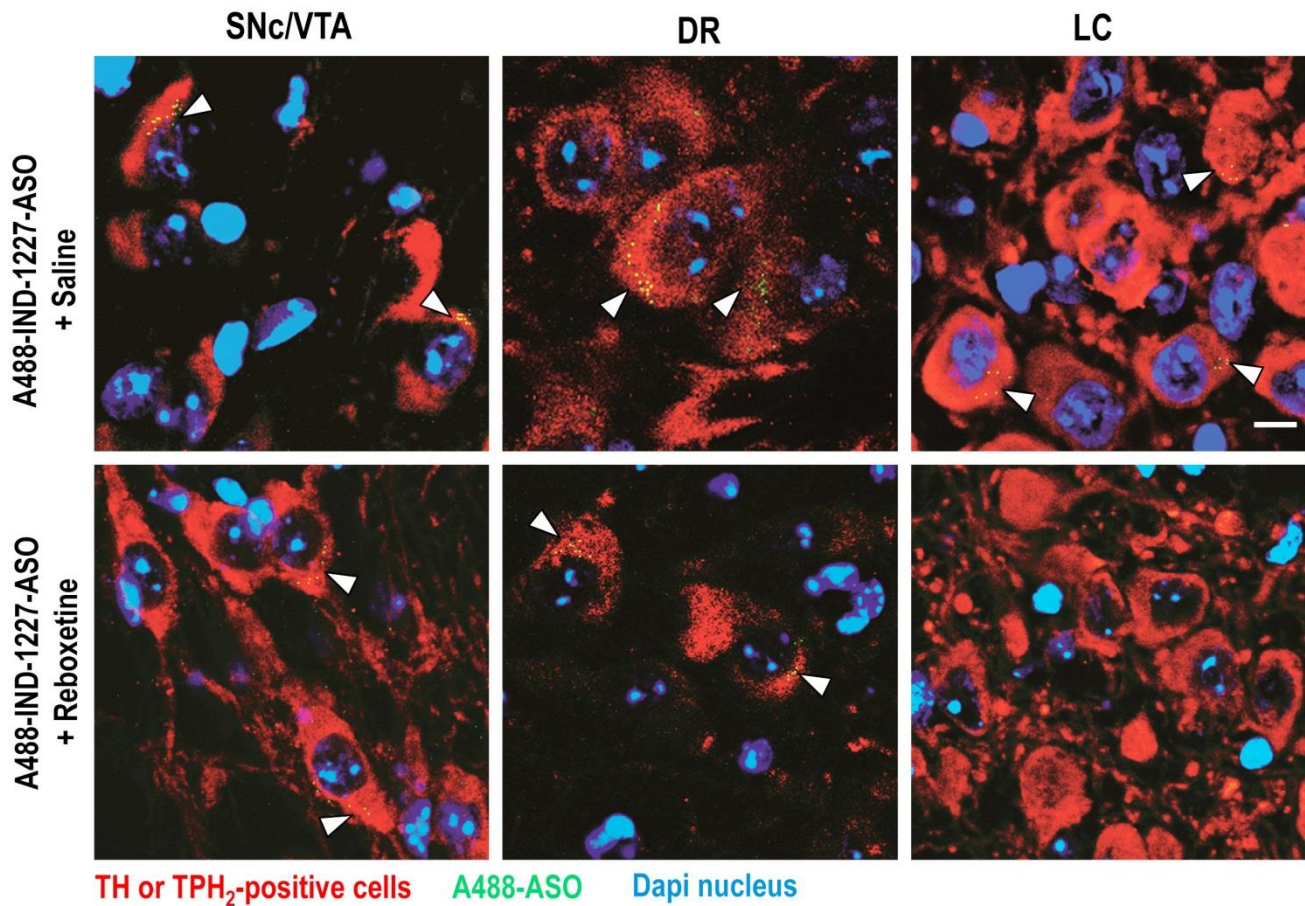

**Figure S6. Effect of reboxetine NET inhibitor on *in vivo* cellular uptake of indatraline-conjugated nonsense-ASO (IND-1227-ASO) into NE neurons**

Mice were pretreated with: a) reboxetine 10 mg/kg, i.p. (DAT/NET inhibitor) or b) saline solution, i.p. for 3 h before the i.n. administration of IND-1227-ASO at 30  $\mu$ g/day for 4 days. Mice were sacrificed 6h after last administration of IND-1227-ASO (n=3 mice/group). Representative confocal images showing the co-localization of A488-IND-1227-ASO (yellow) with TH-positive neurons (red) in SNc/VTA and LC or TPH<sub>2</sub>-positive neurons (red) in DR identified with white arrowheads (Top panel, images are the same as in Figure 2a). Representative confocal images showing co-localization of A488-IND-1227-ASO (yellow) with TH-positive neurons in SNc/VTA or TPH<sub>2</sub>-positive neurons (red) in DR, but not with TH-positive neurons (red) in LC (Down panel). Cell nuclei were stained with Dapi (blue). As seem, the accumulation of IND-1227-ASO in TH-positive NE neurons was completely blocked by reboxetine confirming that NET is a requirement to uptake of oligonucleotide. Scale bars: 10  $\mu$ m. SNc/VTA, substantia nigra compacta/ventral tegmental area; DR, dorsal raphe nucleus; LC, locus coeruleus; NET, norepinephrine transporter; NE norepinephrine.



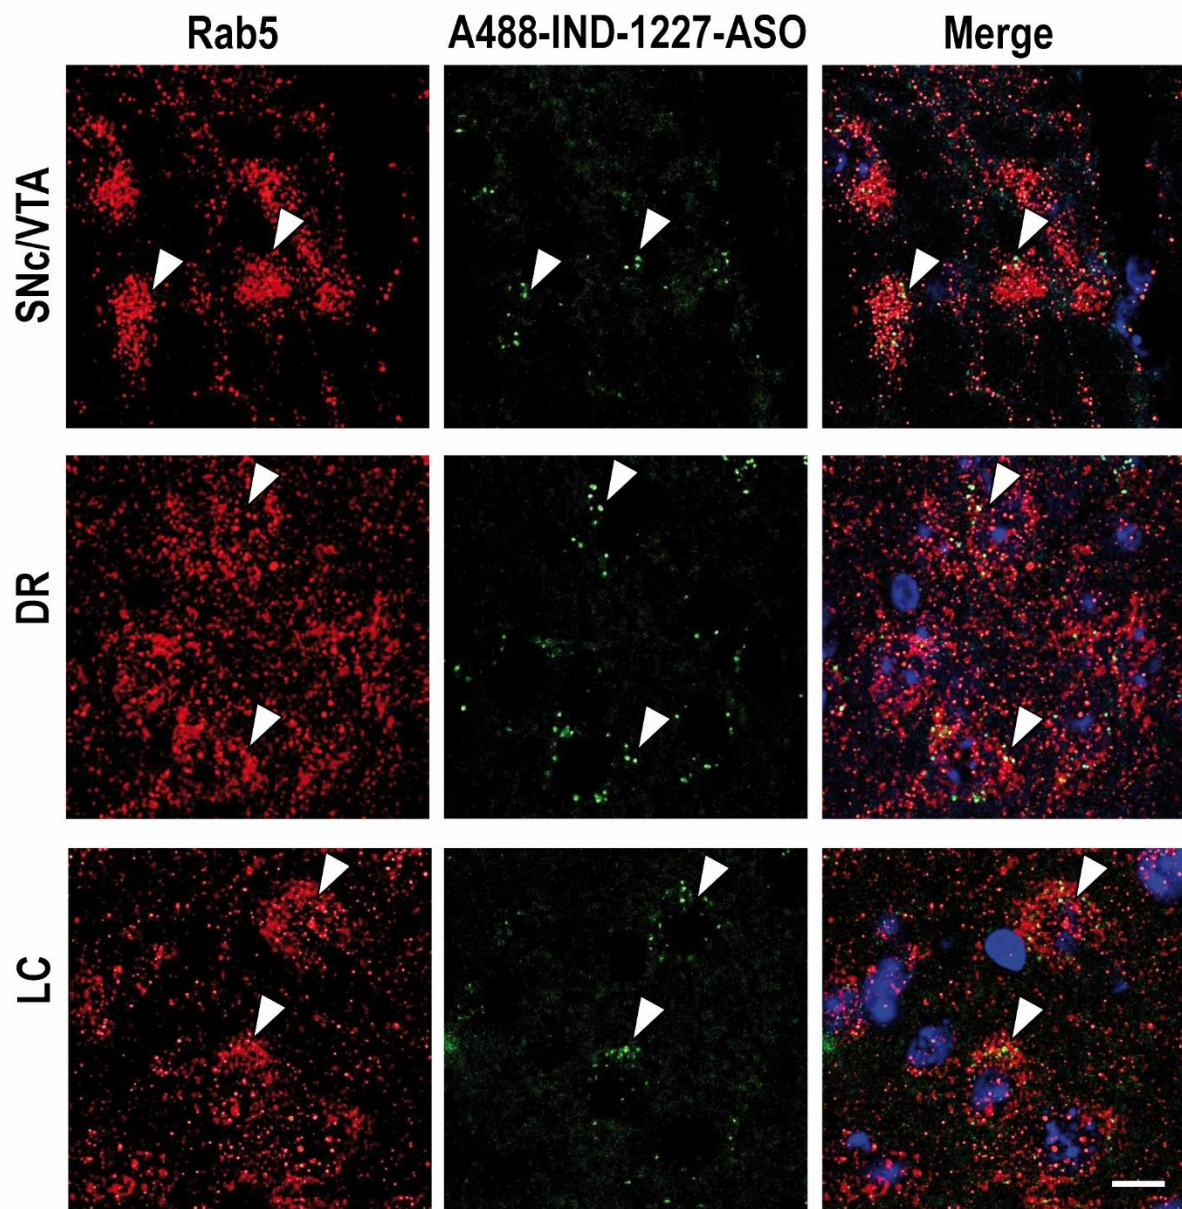

**Figure S7. Co-localization of alexa488-labeled indatraline-conjugated nonsense-ASO (A488-IND-1227-ASO) with early endosome marker Rab5**

Confocal images showing the co-localization (yellow) of A488-IND-1227-ASO (green) with Rab5 (red) in SNC/VTA, DR or LC neurons. Scale bar: 10  $\mu$ m. Vesicles are marked with white arrowheads. DR, dorsal raphe nucleus; LC, locus coeruleus; SNC/VTA, substantia nigra compacta/ventral tegmental area.



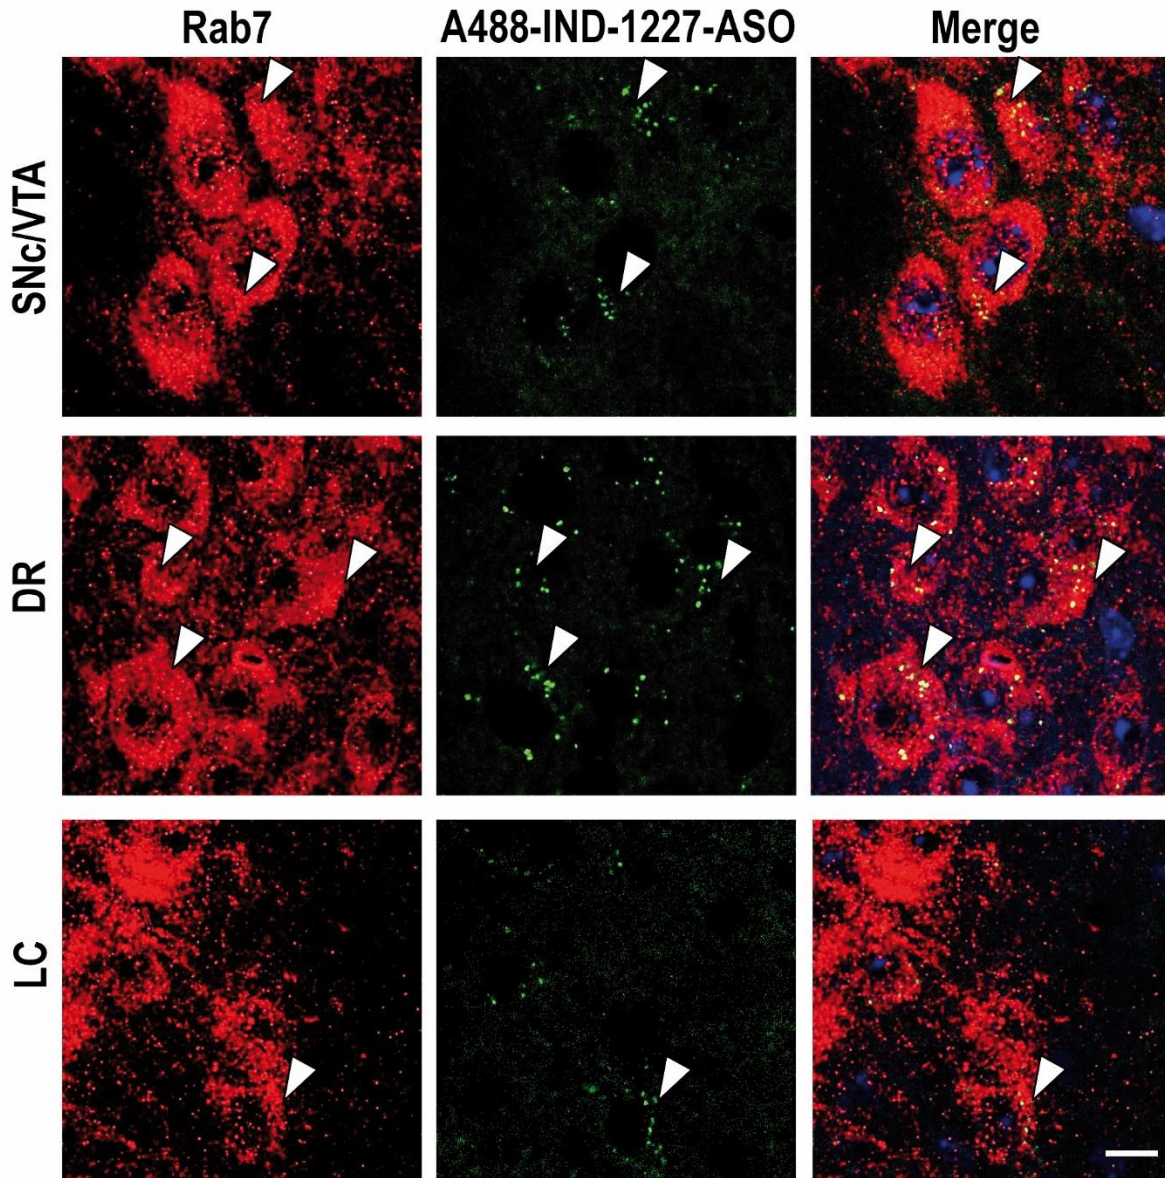

**Figure S8. Co-localization of alexa488-labeled indatraline-conjugated nonsense-ASO (A488-IND-1227-ASO) with late endosome marker Rab7**

Confocal images showing the co-localization (yellow) of A488-IND-1227-ASO (green) with Rab7 (red) in SNc/VTA, DR or LC neurons. Scale bar: 10  $\mu$ m. Vesicles are marked with white arrowheads. DR, dorsal raphe nucleus; LC, locus coeruleus; SNc/VTA, substantia nigra compacta/ventral tegmental area.

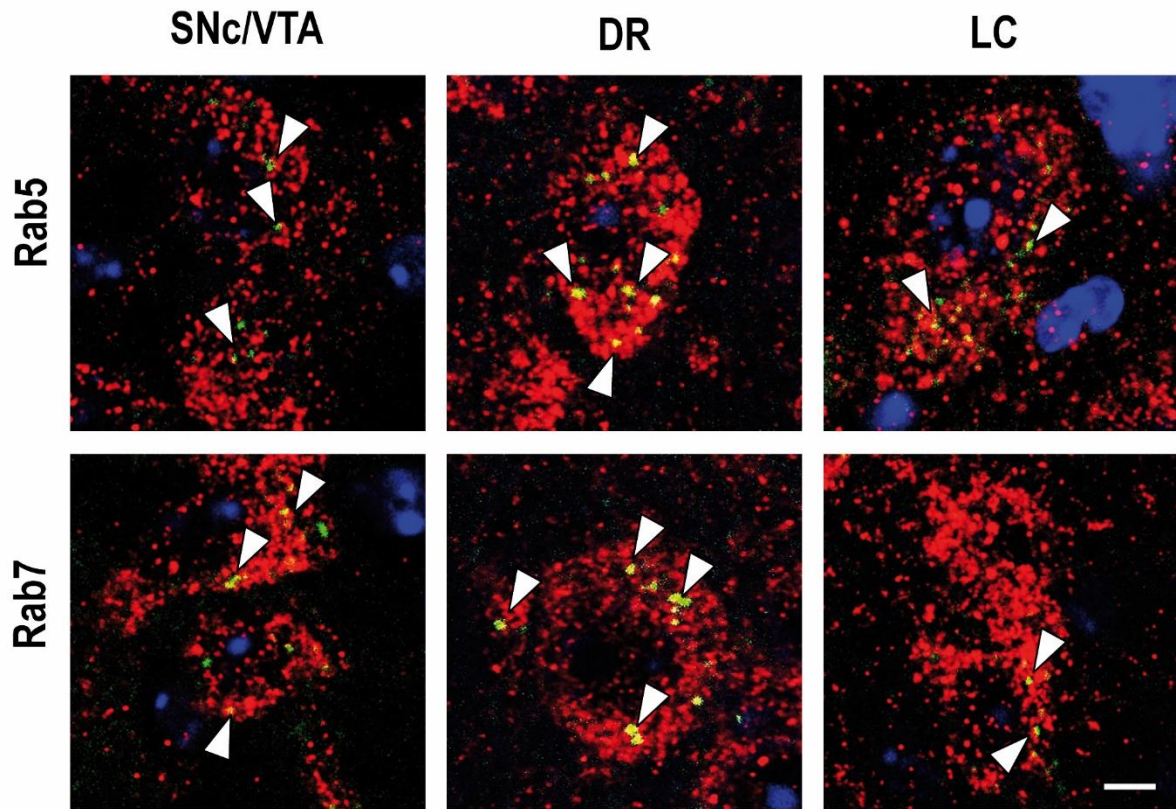

**Figure S9. Co-localization of alexa488-labeled indatraline-conjugated nonsense-ASO (A488-IND-1227-ASO) with Rab5 or Rab7**

Confocal images showing the co-localization (yellow) of A488-IND-1227-ASO (green) with Rab 5 or Rab7 (red) in SNc/VTA, DR or LC neurons. Enlarged images were obtained from brain sections of mice treated with A488-IND-1227-ASO at 30  $\mu\text{g}/\text{day}$  for 4 days (the same mice as in Supp Figures S3 and S4). Scale bar: 10  $\mu\text{m}$ . Vesicles are marked with white arrowheads. DR, dorsal raphe nucleus; LC, locus coeruleus; SNc/VTA, substantia nigra compacta/ventral tegmental area.

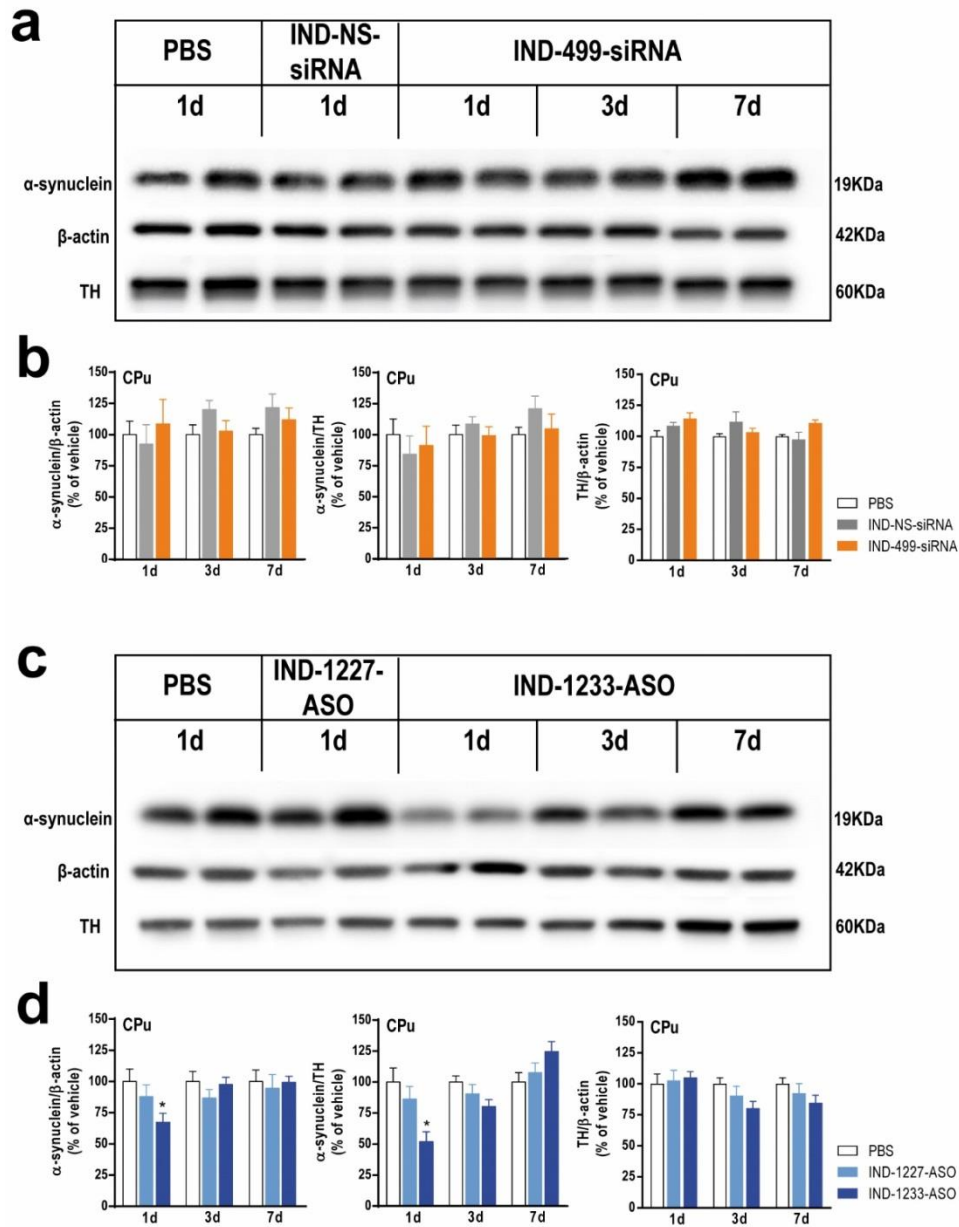

**Figure S10.  $\alpha$ -Synuclein protein levels in caudate putamen after intranasal treatment with indatraline-conjugated oligonucleotides**

Mice were intranasally administered with PBS, indatraline-conjugated nonsense siRNA (IND-NS-siRNA), indatraline-conjugated 499-siRNA (IND-499-siRNA), indatraline-conjugated nonsense ASO (IND-1227-ASO) or indatraline-conjugated 1233-ASO (IND-1233-ASO) at 30  $\mu$ g/day during 4 days and were sacrificed at 1, 3 or 7 days post-administration (1d, 3d or 7d, respectively; n=8-10 mice/group). **(a)** Image of immunoblot of  $\alpha$ -synuclein,  $\beta$ -actin and tyrosine hydroxylase (TH) in caudate putamen (CPu) of mice treated with siRNA. **(b)** Bar graphs showing  $\alpha$ -synuclein protein levels in CPu normalized against  $\beta$ -actin or TH and TH levels normalized against  $\beta$ -actin. IND-499-siRNA did not produce any alteration in the striatal  $\alpha$ -synuclein protein level. **(c)** Image of immunoblot of  $\alpha$ -synuclein,  $\beta$ -actin and TH in caudate putamen (CPu) of mice treated with ASO molecules. **(d)** Bar graphs showing  $\alpha$ -synuclein protein levels in CPu normalized against  $\beta$ -actin or TH and TH levels normalized against  $\beta$ -actin. Unlike IND-499-siRNA, IND-1233-ASO reduced  $\alpha$ -synuclein protein level in CPu 24h after last administration, and then the levels were recovered 3 days later. \* $P$ <0.05 versus control groups (Two-way ANOVA followed by Tukey's *post-hoc* test). Values are mean  $\pm$  SEM.



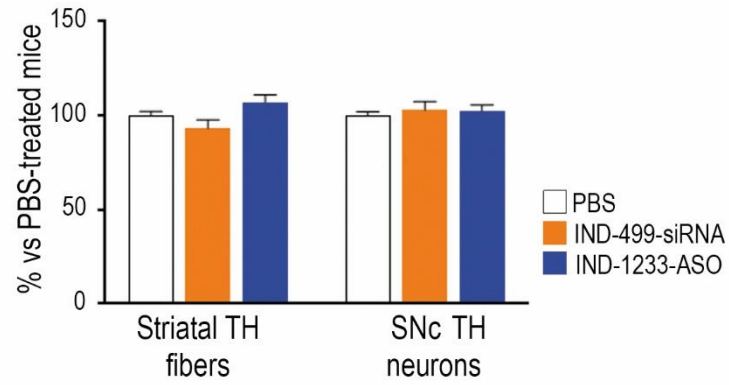

**Figure S11. Absence of dopaminergic neurotoxicity after intranasal administration of indatraline-conjugated 499-siRNA (IND-499-siRNA) or indatraline-conjugated 1233-ASO (IND-1233-ASO)**

Mice received intranasally PBS, IND-499-siRNA or IND-1233-ASO at 30  $\mu\text{g}/\text{day}$  for 4 days and were sacrificed 7 days post-administration. Bar graphs show no differences in the number of SNc TH-positive neurons (right) or density of TH-positive striatal terminals (left), ( $n=5$  mice/group). Values are mean  $\pm$  SEM.

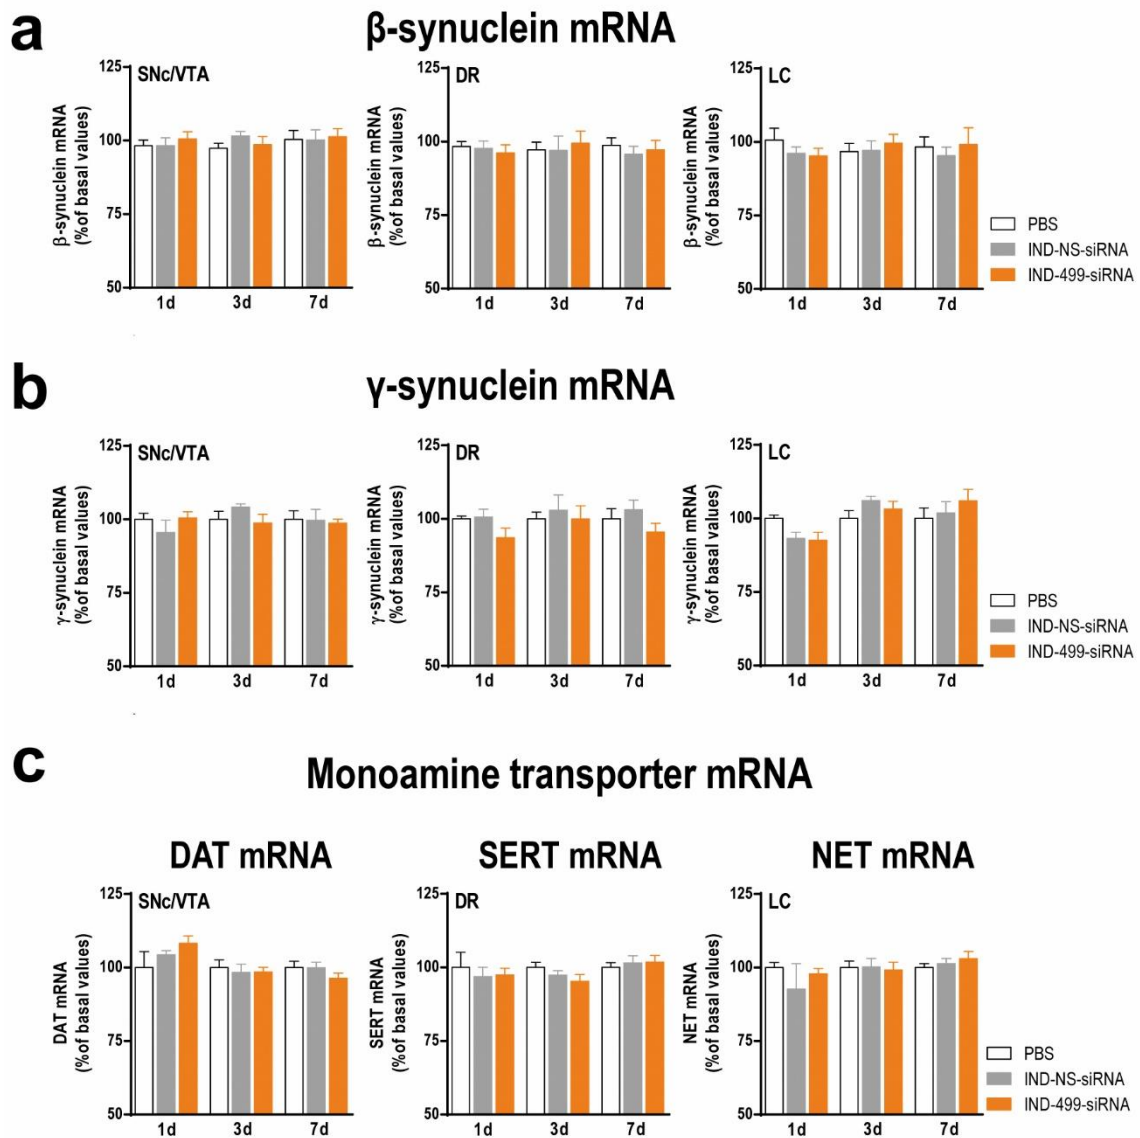

**Figure S12. Selective suppression of  $\alpha$ -synuclein expression after intranasal administration of indatraline-conjugated 499-siRNA (IND-499-siRNA)**

Mice received intranasally PBS, indatraline-conjugated nonsense siRNA (IND-NS-siRNA) or IND-499-siRNA at 30  $\mu$ g/day during 4 days and were killed 1, 3 and 7 days post-administration (1d, 3d or 7d, respectively; n=4-5 mice/group). (a-c) Quantitative analysis of autoradiograms (ROD) showed no differences in  $\beta$ -synuclein mRNA (a),  $\gamma$ -synuclein mRNA (b) and DAT, SERT and NET mRNA (c) densities in SNc/VTA, DR and LC assessed by in situ hybridization (ISH). Values are mean  $\pm$  SEM and are normalized based on mice receiving PBS as 100%.

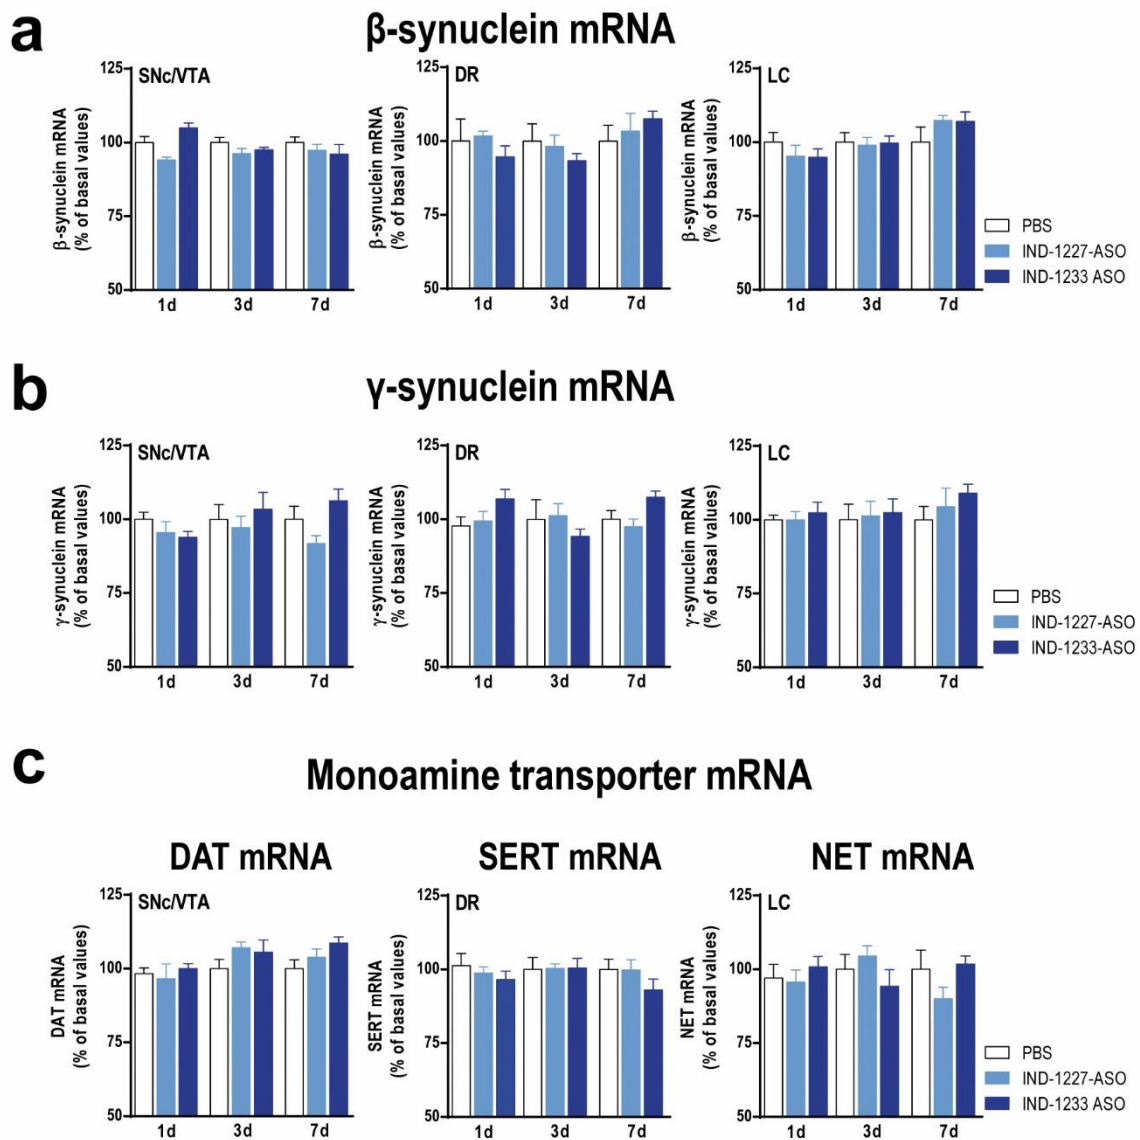

**Figure S13. Selective suppression of  $\alpha$ -synuclein expression after intranasal administration of indatraline-conjugated 1233-ASO (IND-1233-ASO)**

Mice received intranasally PBS, indatraline-conjugated nonsense ASO (IND-1227-ASO) or IND-1233-ASO at 30  $\mu$ g/day during 4 days and were killed 1, 3 and 7 days post-administration (1d, 3d or 7d, respectively; n=4-5 mice/group). (a-c) Quantitative analysis of autoradiograms (ROD) showed no differences in  $\beta$ -synuclein mRNA (a),  $\gamma$ -synuclein mRNA (b) and DAT, SERT and NET mRNA (c) densities in SNc/VTA, DR and LC assessed by in situ hybridization (ISH). Values are mean  $\pm$  SEM and are normalized based on mice receiving PBS as 100%.

**Table S1.** Sequences of siRNA and ASO molecules

| siRNAs/ASOs                          | forward                 | reverse                 |
|--------------------------------------|-------------------------|-------------------------|
| <b>Nonsense</b>                      |                         |                         |
| NS-siRNA                             | aguacugcuuacgauacggTT   | ccguaucguaagcaguacuTT   |
| 1227-ASO                             | <i>not applicable</i>   | ccgtATCGTAAGCAgtac      |
| <b><math>\alpha</math>-Synuclein</b> |                         |                         |
| 499-siRNA                            | agaagacaguggaggagcTT    | gcuccuccacugucuucuTT    |
| MAYO2-siRNA                          | aacaguggcugagaagaccaaTT | uuggucuucucagccacuguuTT |
| SNC2-siRNA                           | ggaguccucuauguagguTT    | accuacauagaggacuccTT    |
| 1233-ASO                             | <i>not applicable</i>   | cuccCTCCACTGTCuucu      |

ASOs are 18mer single stranded DNA molecules with four 2'-O-methyl RNA bases at both ends. 1233-ASO: 5'-cuccdCdTdCdCdAdCdTdGdTdCuucu-3' and 1227-ASO: 5'-ccgtdAdTdCdGdTdAdAdGdCdAgtac-3' with lower case letters = 2'-OMethyl and "d" = 2'-deoxy nucleotides.



**Table S2.** Baseline DA and 5-HT dialysate concentrations in the CPu and mPFC of mice

| Groups              | Experimental Conditions       | CPu             |                 | mPFC           |                 |
|---------------------|-------------------------------|-----------------|-----------------|----------------|-----------------|
|                     |                               | DA              | 5-HT            | DA             | 5-HT            |
| <b>PBS</b>          | aCSF <sup>(a)</sup>           | 15.3±1.9 (n=25) | 3.8±0.5 (n=18)  | 3.1±0.4 (n=17) | 7.5±1.3 (n=9)   |
| <b>IND-1227-ASO</b> | aCSF <sup>(a)</sup>           | 13.3±1.5 (n=18) | n.e             | n.e            | n.e             |
| <b>IND-1233-ASO</b> | aCSF <sup>(a)</sup>           | 13.4±1.5 (n=18) | 2.7±0.4 (n=15)  | 2.1±0.3 (n=16) | 6.8±0.7 (n=8)   |
| <b>PBS</b>          | aCSF+Nom/Cit <sup>(a,c)</sup> | 49.4±9.6 (n=9)  | 10.1±1.1 (n=12) | 28.4±4.6 (n=5) | 13.7±1.7 (n=10) |
| <b>IND-1227-ASO</b> | aCSF+Nom/Cit <sup>(a,c)</sup> | 39.2±9.4 (n=7)  | n.e             | n.e            | n.e             |
| <b>IND-1233-ASO</b> | aCSF+Nom/Cit <sup>(a,c)</sup> | 52.8±21.3 (n=6) | 11.3±1.2 (n=13) | 27.7±2.6 (n=5) | 15.3±2.1 (n=9)  |
| <b>PBS</b>          | aCSF+Nom/Cit <sup>(b,d)</sup> | 34.7±5.6 (n=9)  | 17.0±4.5 (n=5)  | 13.5±2.1 (n=6) | 18.8±1.3 (n=5)  |
| <b>IND-1227-ASO</b> | aCSF+Nom/Cit <sup>(b,d)</sup> | 45.3±5.50 (n=9) | n.e             | n.e            | n.e             |
| <b>IND-1233-ASO</b> | aCSF+Nom/Cit <sup>(b,d)</sup> | 41.1±10.9 (n=9) | 22.9±7.1 (n=6)  | 11.8±1.9 (n=6) | 15.9±1.1 (n=5)  |
| <b>TG-</b>          | aCSF <sup>(a)</sup>           | 13.4±1.1 (n=16) | n.e             | n.e            | n.e             |
| <b>TG+</b>          | aCSF <sup>(a)</sup>           | 15.2±1.6 (n=14) |                 | n.e            | n.e             |
| <b>TG-</b>          | aCSF+Nom/Cit <sup>(a,c)</sup> | 35.9±11.3 (n=7) | n.e             | n.e            | n.e             |
| <b>TG+</b>          | aCSF+Nom/Cit <sup>(a,c)</sup> | 33.6±7.1 (n=8)  | n.e             | n.e            | n.e             |
| <b>TG-</b>          | aCSF+Nom/Cit <sup>(b,d)</sup> | 50.2±10.4 (n=3) | n.e             | n.e            | n.e             |
| <b>TG+</b>          | aCSF+Nom/Cit <sup>(b,d)</sup> | 52.3±9.1 (n=5)  | n.e             | n.e            | n.e             |

Extracellular DA and 5-HT levels are expressed as fmol/20-min fraction<sup>(a)</sup> or fmol/10-min fraction<sup>(b)</sup>. In the experiments involving the evaluation of effects of quinpirole, CP93129 or 8-OH-DPAT on extracellular DA or 5-HT levels, nomifensine (Nom) or citalopram (Cit) was added in the aCSF at 10 or 1 $\mu$ M<sup>(c)</sup>, respectively. In addition, Nom or Cit at 50 $\mu$ M<sup>(d)</sup> was added in the aCSF to evaluate tetrabenazine effects<sup>46,48,79,80</sup>. Data are means  $\pm$  SEM of the number of mice shown in parentheses. n.e., not examined. TG+, transgenic mice expressing human wild-type  $\alpha$ -synuclein cDNA under the control of TH promoter; TG-, control mice under the same background.

## Supplemental Methods

### Conjugated siRNA and ASO synthesis

The synthesis and purification of unmodified and indatraline-conjugated molecules of ASO targeting  $\alpha$ -synuclein (1233-ASO, GenBank accession AH008229.3), nonsense-ASO (1227-ASO) and siRNAs (499-siRNA, GenBank accession NM\_001042451.2; MAYO-siRNA, GenBank accession XM\_012774027.2 and SNCA2-siRNA, GenBank accession NM\_001042451.2) were performed by nLife Therapeutics S.L. (Granada, Spain). ASO molecules consisted of an antisense GapMer of 18 nucleotides with a central block of DNA flanked by 2-O methyl RNA bases to protect the internal DNA from nuclease degradation and improve the binding to the target sequence.

In brief, ASO and siRNA synthesis was performed using ultra mild-protected phosphoramidites (Glen Research, Sterling, VA, USA) and H-8 DNA/RNA Automatic synthesizer (K&A Laborgeraete GbR, Schaaheim, Germany). Indatraline (hydrochloride, trans-racemate) was conjugated to 5'-carboxy-C10 modified oligonucleotide through an amide bond. This condensation was carried out under organic conditions (DIPEA / DMF, rt, 24h). Conjugated oligonucleotides were purified by high performance liquid chromatography using a RP-C18 column (4.6x150 mm, 5  $\mu$ m) under a linear gradient condition of acetonitrile. The molecular weights of the oligonucleotide strands and the conjugate were confirmed by MALDI-TOF mass spectrometry (Ultraflex, Bruker Daltonics). The concentration of the conjugates was calculated on the basis of absorbance at 260nm wavelength. Complementary strands were annealed in an isotonic RNA-annealing buffer (100mM potassium acetate, 30mM HEPES pH 7.4, 2mM magnesium acetate) at 90°C by 1min, centrifuged for 15s and incubated 1h at 37°C. Duplex RNA formation was confirmed using 20% polyacrylamide gel electrophoresis (PAGE, 30mA, 60min) and visualized by silver staining (DNA Silver stain kit, GE Healthcare, Piscataway, NJ). Sequences are shown in **Supplemental Table S1**.

### *In situ* hybridization

Frozen tissue sections were first brought to room temperature, fixed for 20min at 4°C in 4% paraformaldehyde in phosphate-buffered saline (1xPBS: 8mM Na<sub>2</sub>HPO<sub>4</sub>, 1.4mM KH<sub>2</sub>PO<sub>4</sub>, 136mM NaCl, and 2.6mM KCl), washed for 5min in 3xPBS at room temperature, twice for 5min each in 1xPBS, and incubated for 2min at 21°C in a solution of predigested pronase (Calbiochem, San Diego, CA) at a final concentration of 24 U/mL in 50mM Tris-HCl, pH 7.5, and 5mM EDTA. The enzymatic activity was stopped by immersion for 30s in 2 mg/ml glycine in 1xPBS. Tissues were finally rinsed in 1xPBS and dehydrated through a graded series of ethanol. For hybridization, the radioactively labeled probes were diluted in a solution containing 50% formamide, 4x standard saline citrate, 1x Denhardt's solution, 10% dextran sulfate, 1% sarkosyl, 20mM phosphate buffer, pH 7.0, 250  $\mu$ g/ml yeast tRNA, and 500  $\mu$ g/ml salmon sperm DNA. The final concentrations of radioactive probes in the hybridization buffer were in the same range (~1.5 nM). Tissue sections were covered with hybridization solution containing the labeled probes, overlaid with Nescofilm coverslips (Bando Chemical Ind., Kobe, Japan), and incubated overnight at 42°C in humid boxes. Sections were then washed 4 times (45min each) in a buffer containing 0.6M NaCl and 10mM Tris-HCl (pH 7.5) at 60°C. Hybridized sections were exposed to Biomax-MR film (Kodak, Sigma-Aldrich, Madrid, Spain) for 1-4 weeks with intensifying screens. For specificity control, adjacent sections were incubated with an excess (50x) of unlabeled probes. The cytoarchitecture of different mouse brain areas was analyzed in an adjacent series of cresyl-violet stained frozen sections.

### Confocal fluorescence microscopy

Brain sections were rinsed with PBS/Triton 0.2%, incubated with 10% normal serum from secondary antibody host and treated with primary antibodies: sheep anti-TPH<sub>2</sub> (1:2500; ref.: AB1541, Merck Millipore), rabbit anti-TH (1:1250; ref.: AB112, Abcam), rabbit anti-Rab5 (1:500; ref.: ab18211, Abcam) or mouse anti-Rab7 (1:2000; ref.: R8779-200UL, Sigma-Aldrich). Sections were then incubated at 4°C overnight, rinsed and treated with respective secondary Alexa555-conjugated antibodies (1:500, A-20000, Life Technologies) for 120min. After subsequent washes, the sections were dehydrated and mounted in the anti-fading agent Prolong Gold with DAPI (Life Technologies). DAPI, Alexa488 and Alexa555 images were acquired sequentially using 405, 488 and 561 laser lines, AOBs (Acoustic Optical Beam Splitter) as beam splitter and emission detection ranges 415- 480, 500-550 and 571-625 nm, respectively and, the confocal pinhole set at 1 Airy units. Images were acquired at 400Hz in a 1024 x 1024 pixel format. Images were composed using NIH ImageJ 1.47n software.

### Treatments

To assess the involvement of monoamine transporters (DAT, SERT and NET) as a gate for the accumulation of indatraline-conjugated ASOs in the monoaminergic neurons, different cohorts of mice were pretreated with: a) sertraline 20 mg/kg, i.p. (selective SERT inhibitor), b) nomifensine 20 mg/kg, i.p. (DAT/NET inhibitor) or c) reboxetine 10 mg/kg/day, i.p. (selective NET inhibitor) for 3 h before the i.n. administration of IND-1227-ASO at 30  $\mu$ g/day for 4 days. Control group received saline solution, i.p. in the same conditions. Mice were sacrificed

6h after last administration of IND-1227-ASO and their brain were removed and processed by immunofluorescence.
